1 Genomic imprinting drives eusociality

2 Kenji Matsuura<sup>1,#\*</sup>, Hiromu Ito<sup>2,#</sup>, Kazuya Kobayashi<sup>3</sup>, Haruka Osaki<sup>4</sup>, Jin Yoshimura<sup>2</sup>,  
3 Edward L. Vargo<sup>5</sup>

4 <sup>1</sup>Laboratory of Insect Ecology, Graduate School of Agriculture, Kyoto University, Kyoto,  
5 Japan. <sup>2</sup> Department of International Health and Medical Anthropology, Institute of  
6 Tropical Medicine, Nagasaki University. Nagasaki, Japan. <sup>3</sup>Hokkaido Forest Research  
7 Station, Field Science Education and Research Center, Kyoto University, Shibecha,  
8 Hokkaido, Japan. <sup>4</sup>Department of Biology, Kyushu University, Fukuoka, Japan.  
9 <sup>5</sup>Department of Entomology, Texas A&M University, College Station, TX, USA. #These  
10 authors contributed equally.

11 \*Kenji Matsuura

12 **Email:** matsuura.kenji.6s@kyoto-u.ac.jp

13 **Author Contributions:** K.M. initiated and directed the research. K.M. and H.I developed  
14 the model with contributions from K.K., H.O, J.Y. and E.V. H.I. carried out the numerical  
15 simulations and mathematical analysis. K.M. and H.O. draw illustrations. H.I., K.K. and  
16 K.M. generated figures of numerical simulations. All authors interpret the results of  
17 simulations. K.M., H.I., J.Y. and E.V. wrote the manuscript.

18 **Competing Interest Statement:** The authors declare no competing interests.

19 **Keywords:** origin of eusociality, termite, epigenetic inheritance, sex antagonism

20

21

22

23

## 24 **Abstract**

25 The origin of eusociality, altruistically foregoing personal reproduction to help others, has  
26 been a long-standing paradox ever since Darwin. Most eusocial insects and rodents  
27 likely evolved from subsocial precursors, in which older offspring “helpers” contribute to  
28 the development of younger siblings without a permanent sterile caste. The driving  
29 mechanism for the transition from subsociality (with helpers) to eusociality (with lifelong  
30 sterile workers) remains an enigma because individuals in subsocial groups are subject  
31 to direct natural selection rather than kin selection. Our genomic imprinting theory  
32 demonstrates that natural selection generates eusociality in subsocial groups when  
33 parental reproductive capacity is linked to a delay in the sexual development of offspring  
34 due to sex-antagonistic action of transgenerational epigenetic marks. Focusing on  
35 termites, our theory provides the missing evolutionary link to explain the evolution of  
36 eusociality from their subsocial wood-feeding cockroach ancestors, and provides a novel  
37 framework for understanding the origin of eusociality.

38

## 39 **Introduction**

40 The origin of eusociality poses a major challenge to Darwin's theory of natural selection  
41 (Darwin, 1859) and it remains a subject of debate today (Kay et al., 2020; Nowak et al.,  
42 2010; Wilson and Hölldobler, 2005). Eusociality is an advanced state of sociality  
43 characterized by the presence of workers that forego personal reproduction in exchange  
44 for altruistic behavior toward close relatives. It has long been studied within the paradigm  
45 of inclusive fitness and kin selection (Hamilton, 1964). However, the role of kin selection  
46 in the origin of eusociality remains controversial (Wilson and Hölldobler, 2005).  
47 Explanations of the origin of new traits are faced with the “selection paradox,” the notion  
48 that selection cannot act on traits that do not yet exist, and therefore cannot directly  
49 cause novelty (Jacob, 1977; Müller and Wagner, 1991). While biologists have made  
50 great progress in the last 150 years in understanding how existing traits diversify, we  
51 have made less progress in understanding how novel traits arise in the first place. What  
52 generates the novelty—here the first appearance of sterile workers?

53 In colonies of eusocial insect (ants, bees, wasps and termites), workers take on non-  
54 reproductive tasks and contribute to their parents' reproduction (Wilson, 1971). The  
55 colony essentially behaves as a superorganism operating as a functionally integrated

56 unit, analogous to the organization of unitary organisms (Hölldobler and Wilson, 2009).  
57 In eusocial colonies, the worker caste is an extended phenotype of the parents. Unlike  
58 unitary organisms, however, the extended phenotype of a social insect colony enables  
59 selection to act at both the individual (within-colony selection) and colony levels  
60 (between colony selection). Suppose the first eusocial colony appears on Earth. This  
61 colony uniquely has lifelong sterile workers, while all other attributes are identical to  
62 other colonies. Initially, the colony cannot compensate for the loss of fitness due to  
63 sterility of some offspring unless the parents can simultaneously increase their  
64 reproductive output to produce a greater number of fertile offspring. One or more  
65 underlying mechanisms are required to link worker sterility with increased reproductive  
66 capacity of the parents.

67 Termite societies, like those of eusocial Hymenoptera (ants and some bees and  
68 wasps), are generally large families with a reproductive division of labor. These two  
69 groups evolved complex societies independently with different life history pre-  
70 adaptations for social evolution. Termites are the oldest social insects, with societies  
71 dating back to 150 million years ago (Bourguignon et al., 2015). Eusociality in termites  
72 evolved from a subsocial precursor that lived in close family groups and occupied dead  
73 trees, as in its sister group Cryptocercidae (woodroaches) (Thorne, 1997) (Fig. 1). The  
74 confined nest cavities, slow development due to poor nutritional quality of wood, and  
75 need for refaunation of obligate gut symbionts selected for parental care and long-term  
76 associations of monogamous family groups (Nalepa, 1994). One requisite condition for  
77 the origin of eusociality is iteroparity, which is not present in extant semelparous  
78 woodroaches (Korb, 2008; Thorne, 1997). In the subsocial ancestor, iteroparous parents  
79 produced brood of staggered age classes living together, where all surviving offspring  
80 eventually matured into reproductive imagoes and dispersed to found new colonies.

81 The evolutionary transition from subsociality to eusociality, where the older brood  
82 spend a prolonged period in the immature stages within the natal nest and eventually  
83 become lifelong workers that contribute to the production of younger brood, is an enigma  
84 (Korb, 2008; Thorne, 1997). Although the shift of brood care from parents to older  
85 offspring, i.e., helpers, allows the parents to engage more in reproduction, selection is  
86 still acting at the individual level rather than the colony level at the subsocial stage. Why  
87 did helpers delay and eventually sacrifice their own reproduction under individual-level  
88 selection? We show that this paradox can be solved by genomic imprinting.

89 Recent studies reveal that the transfer of epigenetic marks from parents to offspring  
90 can influence offspring phenotype independently of DNA sequence (Bonduriansky and  
91 Day, 2008; Chong and Whitelaw, 2004; Ferguson-Smith, 2011; Jablonka and Raz,  
92 2009). Such ‘epigenetic inheritance’ provides the key to many unsolved puzzles in a  
93 wide range of biological processes by circumventing the limitations of genetic inheritance  
94 (Bonduriansky and Day, 2008; Matsuura, 2020a; Pál and Miklós, 1999). Genomic  
95 imprinting can be differentially marked in eggs and sperm, and inheritance of these  
96 epigenetic marks causes genes to be expressed in a parental-origin-specific manner in  
97 the offspring (Reik and Walter, 2001). Genomic imprinting has been proposed as a  
98 mechanism underlying the parental effects on caste determination (Matsuura et al.,  
99 2018) and the evolution of asexual queen succession in termites (Matsuura, 2017;  
100 Matsuura et al., 2018, 2009) (see supplementary text, Figs. S1 and S2). Thus, queen-  
101 and king- specific epigenetic marks antagonistically influence the development of  
102 offspring resulting in “neuter” workers whose sexual development is suppressed due to  
103 counterbalanced maternal and paternal imprinting.

104

105

## 106 **Model**

107 **General framework.** To consider the evolutionary transition from subsocial to eusocial  
108 in the ancestor of termites, we suppose a diploid subsocial organism in which a male  
109 and a female cooperatively found a new colony in an enclosed habitat. We performed  
110 evolutionary simulations by running colony generation  $G$ , where each generation  
111 includes a colony life cycle as a part of the simulation (Fig. 2, Fig. S6). The colony life  
112 cycle is given as follows. An individual has longevity  $\Phi$  (years), where its age  $i$  varies  
113 from 0 to  $\Phi$ . Individuals spend  $\tau$  ( $\geq \tau_{min}$ : the shortest time to become alates) in their  
114 natal nests and become alates that disperse. The colony dies when the parents die.  
115 Thus, colony longevity  $T$  is given by  $\Phi - \tau$  (Fig. 2A), where colony age  $t$  varies from 0 to  
116  $T$ . Fitness gain  $\omega_t$  of the colony at  $t$  is the sum of the reproductive values of dispersing  
117 alates (Fig. 2A). Total fitness of the colony  $W$  is given by

$$118 \quad W = \sum_{t=0}^T \omega_t .$$

119

120 **Colony foundation.** We consider a monogamous pair of a male and a female founding  
121 a new colony in a nest inside wood. The work performance of each parent is  $\rho$  (J/year),

122 that is, the amount of resources acquired by a parent. Both the male and female founder  
123 contribute to the production of eggs equally. The available resources for egg production  
124 of a  $t$ -year-old colony is  $R_t$ . In the first year (0-year-old colony), the parents produce  
125 eggs by using the available resources  $R_0$  (J) ( $= 2\rho$ ) (Fig. 2B). The number of first brood  
126 eggs  $F_0$  is given by

$$127 \quad F_0 = \frac{\alpha R_0}{r} = \frac{2\alpha\rho}{r}$$

128 where  $\alpha$  is the metabolic efficiency of the parents to convert the resources into eggs,  $r$  is  
129 the cost for producing one egg. For simplicity, we set  $\alpha/r = 1$ , i.e.,  $F_0 = 2\rho$ . The final  
130 family composition of the 0-year-old colony is: a founding male, a founding female and  
131 first brood ( $F_0$  eggs).

132 Second year (1-year-old colony): The 1st brood develop into 1-year old larvae, which  
133 are too small and undeveloped to contribute to social labor. In the second year, the  
134 available resources  $R_1$  (J) are still  $2\rho$ . Parents produce  $F_0$  eggs of the 2nd brood in the  
135 second year. Therefore, the final family composition of the 1-year-old colony is: a  
136 founding male, a founding female, first brood ( $F_0$  1-year-old larva) and 2nd brood ( $F_0$   
137 eggs).

138 In the third year, the 2nd brood are 1-year-old, which do not contribute to social labor.  
139 The 1st brood are 2-years-old, at which time they begin to contribute to social labor as  
140 helpers.

141

142 **Work performance of helpers.** Work performance  $P_i$  (J/year) of a helper offspring  
143 increases with age  $i$ . Eggs (0-year-old) and 1-year-old larva do not contribute to social  
144 labor. Offspring older than 5 years achieve the maximum performance  $\beta \cdot \rho$  in their  
145 lifetime, where  $\beta$  is the relative work efficiency of helpers compared to the work  
146 performance of a parent  $\rho$  (Figs. S3 and S4). If  $\beta$  is 1, mature helpers (offspring older  
147 than 5 years) have the same work performance as a parent. The 2-4 year old offspring  
148 have intermediate performance. Hence, the work performance  $P_i$  of a helper at age  $i$   
149 (year) is given by

$$150 \quad P_i = \begin{cases} 0 & (i = 0) \\ \frac{\beta\rho(i-1)}{4} & (1 \leq i \leq 5) \\ \beta\rho & (i > 5) \end{cases}$$

151 Total acquired resources  $R_t$  (J) are

152  $R_t = 2\rho + \sum H_i \cdot P_i,$

153 where  $H_i$  is the number of  $i$ -year-old helpers.

154

155 **Reproductive capacity and genomic imprinting.** Relationship between the amount of  
156 resources  $R_t$  and the number of eggs  $F_t$  produced in year  $t$  is given by

157 
$$F_t = \begin{cases} \frac{\alpha R_t}{r}, & \frac{\alpha R_t}{r} < C_t \\ C_t, & \frac{\alpha R_t}{r} \geq C_t \end{cases},$$

158 where  $C_t$  is the reproductive capacity of the parents at colony age  $t$  (Fig. 3A).

159 Reproductive capacity of the parents  $C_t$  increases with their sexual development.

160 Reproductive capacity of the parents  $C_t$  is given by

161  $C_t = K_G \cdot \tanh(t + 1),$

162 where  $K_G$  is the maximum fecundity of the parents (Fig. 3A).

163 The maximum reproductive capacity  $K_G$  is determined by sexual development of the  
164 parents, which is acquired through canalization of the expression of sexual development  
165 genes through epigenetic modification (epimark level)  $E_t$  (Fig. 3B).

166 
$$E_t = \frac{dC_t}{dt} = \frac{4K_G}{\{e^{t+1} + e^{-(t+1)}\}^2}.$$

167 Epigenetic marks are partially inherited by offspring, which leads to a genomic imprinting  
168 effect on the sexual development of the offspring. Therefore, imprinting level  $I_t$  at colony  
169 age  $t$  is given by

170  $I_t = \varepsilon E_t.$

171 where  $\varepsilon$  is the transmission rate of parental epimarks to offspring (Fig. 3B).

172 Antagonistic action of paternal imprinting  $I_m$  and maternal imprinting  $I_f$  delay the initiation  
173 of sexual development of offspring, resulting in prolongation of the offspring's time to  
174 become alates  $\tau$  (Fig. 3C). For simplicity, we assume

175  $I_m = I_f = I_t.$

176

177 **Genomic imprinting and maturation delay of offspring.** The time  $\tau$  required to become  
178 alates, numerically calculated from  $I_t$  and its boundary conditions, is given by

179 
$$\tau_t = \begin{cases} \tau_{min} & (I_t \leq \tau_{min}) \\ I_t & (\tau_{min} < I_t) \end{cases}.$$

180 The offspring that have spent  $\tau_t$  after hatching in year  $t$  become alates, contributing to the  
181 founders' fitness (Fig. 2A). We set  $\tau_{min} = 4$  (years) based on the subsocial sister group

182 *Cryptocercus* woodroaches, whose maturity takes about 6 years (Cleveland et al., 1934;  
183 Nalepa, 1984). Note that when an offspring stays longer in the colony as a helper, its direct  
184 contribution to the yearly fitness is not only delayed, but also its residual life span as a  
185 colony founder is shortened. However, its contribution as a helper will increase the  
186 production of future offspring (younger brothers and sisters) in the current colony (Fig. 2B).  
187 This trade-off between the contribution by staying as helpers and leaving success as  
188 alates is key for the evolution of eusociality.

189

190 **Colony fitness and selection process.** Fitness gain  $\omega_{G,t}$  of the colony at  $t$  is the sum of  
191 the reproductive values of dispersing alates with different ages  $i$ , such that

$$192 \quad \omega_{G,t} = \sum A_{i,t} \cdot q_{G,i} ,$$

193 where  $A_{i,t}$  is the number of alates at age  $i$  produced in year  $t$  and  $q_{G,i}$  is the reproductive  
194 value of an alate at age  $i$ . In exchange for a prolonged helper period, the reproductive  
195 value of an alate  $q_{G,i}$  declines with the shortening of its residual life span  $(\Phi - i)$  after  
196 colony foundation. This discounted reproductive value of an alate at age  $i$  is numerically  
197 calculated from the fitness function  $\omega_{G-1,t}$  of the previous generation  $G - 1$ , such that

$$198 \quad q_{G,i} = \frac{\sum_{t=0}^{\Phi-i} \omega_{G-1,t}}{\sum_{t=0}^{\Phi-\tau_{min}} \omega_{G-1,t}} .$$

199 In order to calculate the fitness of the first generation  $\omega_{1,t}$ , we set  $q_{1,i} = 1$  because there  
200 is no imprinting effects on offspring (all offspring reaching age  $\tau_{min}$  become alates without  
201 delay). Total fitness of generation  $G$  is given by

$$202 \quad W_G = \sum_{t=0}^T \omega_{G,t} ,$$

203 where  $T = \Phi - \tau$ .

204 When the resources exceed the maximum reproductive capacity of the parents  $K_G$ ,  
205 there is no benefit to the colony since they cannot be used to produce additional eggs.  
206 The maximum amount of excess resources  $\Delta R$  due to the limitation of reproductive  
207 capacity  $K_G$  is given by

$$208 \quad \Delta R = R_{G,max} - \frac{rK_G}{\alpha} ,$$

209 where  $R_{G,max}$  is the maximum yearly resources of a colony at generation  $G$ . Mutation from  
210  $K$  to  $K + 1$  takes place if  $\Delta R \geq \frac{r}{\alpha}$  (at least one egg can be produced by the surplus  
211 resource) (Fig. 2C, Figs. S5 and S6). Then selection should fix this mutation if  $W_G \geq W_{G-1}$   
212 (fitness can be increased by mutation). Higher reproductive capacity results from

213 increased epigenetic modification (i.e., stronger canalization (Rice et al., 2016)) of sexual  
214 development genes, which results in a higher imprinting level in offspring. Greater  
215 imprinting further prolongs the helper period resulting in increased resources in the next  
216 generation  $G + 1$ , which again produces surplus resources  $\Delta R$ . This whole process may  
217 be repeated to increase reproductive capacity  $K_G$  as long as the two above-mentioned  
218 conditions are satisfied (Figs. S5 and S6). We consider that eusociality arises at the time  
219 when the first-brood offspring lose all direct fitness. We also note the time at which the  
220 first-brood helpers spend their whole life in the colony, i.e., the appearance of lifelong  
221 helpers.

222

## 223 **Results**

224 We show that genomic imprinting can explain the origin of eusociality, i.e., the first  
225 occurrence of a lifelong neuter caste. To consider the evolutionary transition from  
226 subsocial to eusocial in the ancestor of termites, we suppose a diploid subsocial  
227 organism in which a male and a female cooperatively found a new colony in an enclosed  
228 habitat (Figs. 1F, 1G and 2). We developed a genomic imprinting model that predicts the  
229 evolution of eusociality via natural selection when parental reproductive capacity is  
230 linked to a delay in the sexual development of offspring through transgenerational  
231 epigenetic marks that act in a sex-antagonistic manner. We performed evolutionary  
232 simulations by running colony generation, where each generation includes a colony life  
233 cycle as a part of the simulation (Fig. 2, Fig. S6). Presence of helpers contribute to social  
234 labor, which increases the resources available for egg production (Fig. 2B). Selection  
235 favors higher reproductive capacity of the parents so as to fully utilize the available  
236 resources (Fig. 2C). Acquisition of greater reproductive potential is derived from higher  
237 epigenetic modification (canalization) of the genes for sexual development (Fig. 3 A and  
238 B). This leads to higher genomic imprinting and thus to the prolonged helper period of  
239 the offspring (Fig. 3C).

240 Our numerical algorithm demonstrates that genomic imprinting can drive eusociality via  
241 natural selection on colony founders (Fig. 4). The evolutionary transition from subsocial to  
242 eusocial systems readily occurs when the epimark transmission rate  $\varepsilon$  and/or the helpers'  
243 work performance  $\beta$  are high (Fig. 4A). Because helpers increase the resources available  
244 for egg production (Figs. S3 and S4), natural selection acts on the parents to increase



245 production of alates. Greater reproductive potential requires higher levels of epigenetic  
246 modification. Trans-generational carry-over of sex-specific epimarks leads to higher  
247 genomic imprinting and thus to a prolonged helper period for offspring. This evolutionary  
248 feedback between natural selection and genomic imprinting facilitates the transition from  
249 subsociality to eusociality (Fig. 4B). At some generation, the first-brood offspring lose their  
250 direct fitness (the origin of eusociality, red arrowheads in Fig. 4 B and C), and then spend  
251 their entire life in the colony as helpers (open arrowheads in Fig. 4 B and C). Here the  
252 offspring are essentially the extended phenotype of the parents via genomic imprinting.

253 This feedback process generating eusociality creates parent-offspring conflict  
254 frequently because the first brood decreases its direct (and even inclusive) fitness by  
255 prolonged helper periods (zigzag black and red lines in Fig 4B), but eventually increases  
256 its inclusive fitness. Eusociality can still be achieved even if the helpers' work  
257 performance is reduced by one-half ( $\beta = 0.8 \rightarrow 0.4$ ), although increase in the rate of  
258 parental direct fitness is slowed down (Fig. 4C). When the helpers' work performance is  
259 further reduced ( $\beta = 0.1$ ), natural selection does not drive eusociality (Fig. 4D), because  
260 helpers cannot produce sufficient resources for increased egg production. Most  
261 importantly, the level of genomic imprinting is a key factor driving eusociality; the number  
262 of generations required for eusociality (or lifelong helper) to evolve sharply decreases  
263 with imprinting strength (i.e., epimark transmission rate  $\varepsilon$  for a given  $E_t$ ) (Fig. 4E).  
264 Eusociality cannot be achieved if imprinting strength is too low (gray area in Fig. 4E).  
265 Also, the development of eusociality is impossible if colony longevity  $T$  is too short (Fig.  
266 S7), because the contribution of the first brood helpers cannot be used for the production  
267 of alates in the colony. It should be noted that when  $T$  is larger, it takes more time for  
268 eusociality to evolve. This is because it takes more generations for the first brood to  
269 become lifelong helpers when they have a longer lifespan ( $\Phi = T + \tau_{min}$ ).

270

## 271 Discussion

272 The theoretical framework of the present model assumes iteroparity of the founder  
273 parents within the nest. This assumption is reasonable because all eusocial insects are  
274 iteroparous, which is essential to produce staggered age classes within colonies,  
275 enabling older offspring to rear younger siblings. In contrast, the *Cryptocercus*  
276 woodroach (the sister group of termites) is semelparous (Nalepa, 1988) and not  
277 eusocial. Without iteroparity (no second nor later brood), the evolutionary feedback loop

278 cannot be established. Unlike the Hymenoptera where eusociality evolved multiple  
279 times, eusociality evolved only once in the cockroaches (termites) around 150 Myr ago  
280 (Bourguignon et al., 2015; Legendre et al., 2015). This single origin of eusociality in  
281 Blattodea is likely due to the fact that the acquisition of within-nest iteroparity occurred  
282 only once in this taxon, although non-nesting and serial nesting iteroparity are known in  
283 some species (Trumbo, 2013).

284 The developmental time to reach maturity should have been long in the subsocial  
285 termite ancestor due to a nitrogen-poor wood diet as in wood-feeding cockroaches in  
286 which developmental time ranges from three to seven years (Nalepa, 2015). Among  
287 wood-feeding cockroaches, the sister-group of termites, *Cryptocercus*, is the only known  
288 oviparous cockroach with biparental care and altricial development (Bell et al., 2007;  
289 Klass et al., 2008) under biparental care, crucial conditions for the origin of eusociality  
290 (Nalepa, 2010). The prolonged altricial period of the offspring creates overlapping  
291 broods within a colony providing the opportunity for older brood to help younger sibs  
292 (Thorne, 1997). We can reasonably expect that in the termite ancestor the presence of  
293 older brood was advantageous for the parents and younger sibs because they provided  
294 nest excavation, trophallaxis, allogrooming, defense and other forms of brood care.  
295 Therefore, we can expect high work performance  $\beta$  of the helpers in the subsocial  
296 ancestral state. In our model, a certain level of work performance  $\beta$  is necessary for the  
297 origin of eusociality. Interestingly, however,  $\beta$  can be as low as 0.1 when other  
298 conditions are favorable (e.g.,  $T \geq 15$ ,  $\varepsilon \geq 0.2$ ,  $F_0 \geq 20$ , Fig. 4A).

299 As we discussed at the beginning, the evolutionary mechanisms driving the origin of  
300 eusociality and selection for the maintenance and later elaboration of eusociality should  
301 be discussed separately. We demonstrated that the acquisition of eusociality promotes  
302 the production of alates by a colony and also increases the inclusive fitness of the first  
303 brood compared with the initial subsocial state (Fig. 4 B and C). In this respect, our  
304 findings are consistent with inclusive fitness theory. Most importantly, however, we found  
305 that inclusive fitness theory itself cannot explain the origin of eusociality. During the  
306 transition from the subsocial to the eusocial state, inclusive fitness of the first brood  
307 results in a zigzag line alternating up and down for levels of fitness (Fig. 4 B and C),  
308 because there is a time lag between the origin of a prolonged helper period in the first  
309 brood offspring and an increase in the reproductive capacity of the parents to utilize the  
310 additional resources. This indicates that selection for higher inclusive fitness of the

311 offspring cannot get over the selection valley (it goes down and then up again) and thus  
312 cannot generate lifelong helpers.

313 The earlier hypothesis that tried to overcome this selection valley is parental  
314 manipulation (Alexander, 1974): parents restrict the reproductive options of some  
315 offspring so that they assist in the production of fully fertile offspring. A serious problem  
316 with this hypothesis is that counter-selection on the offspring would make them  
317 overcome parental manipulation. Moreover, this hypothesis also cannot explain the  
318 origin of eusociality, although parental manipulation may increase the parental fitness  
319 and the inclusive fitness of the sterile workers in a eusocial state. Selection cannot act  
320 on the parents *a priori* in favor of restricting offspring's reproductive development in a  
321 subsocial state because it merely reduces the number of fertile offspring and thus their  
322 own fitness unless it can be coupled with the subsequent evolution of the ability of the  
323 parents to utilize the additional resources for reproduction. A related idea of parental  
324 manipulation is the subfertility hypothesis of West-Eberhard (West-Eberhard, 1975),  
325 which assumes that subfertile offspring can be produced by inescapable factors such as  
326 food shortage and these subfertile offspring would give up reproduction and accept a  
327 worker role.

328 Genomic imprinting can be considered one such inescapable factor that produces  
329 subfertile offspring. In our genomic imprinting model, natural selection acts on the  
330 reproductive capacity of parents so as to increase their direct fitness. Greater  
331 reproductive capacity requires higher epigenetic modification of the genes for sexual  
332 development (Rice et al., 2016). Sex-specific epigenetic modifications are potential  
333 mechanisms underlying sexual dimorphism in various taxa (Hall et al., 2014; Pennell and  
334 Morrow, 2013). When sex-specific epimarks that canalize sexually dimorphic  
335 development are inherited by the offspring (Rice et al., 2012), sex-antagonistic action  
336 (Gadagkar, 2000) of the maternally and paternally inherited epimarks generates the  
337 delay of sex expression in the offspring, i.e., the first brood helpers. The offspring's  
338 phenotype resulting from the transgenerational epigenetic inheritance is an extended  
339 phenotype of the parents, and is thus inescapable for the offspring.

340 Ultimately, whether eusociality spreads in a population depends on the specific  
341 benefits of altruistic behavior of the sterile workers relative to their own independent  
342 reproduction (Hamilton, 1964). Right at and after the origin of eusociality, the fitness  
343 interests of the parents and the offspring coincide with each other (Fig. 4 B and C, Fig.

344 S7): the inclusive (i.e., indirect) fitness of the sterile helpers coincides with the direct  
345 fitness of the parents (i.e., colony fitness). From this point on, the subsequent evolution  
346 of eusociality is promoted by kin selection, where Hamilton's rule  $r > c/b$  is satisfied. In  
347 the current numerical analysis, relatedness  $r$  is 0.5 because we assume lifelong  
348 monogamy of the parents (Boomsma, 2009), and the work performance of helpers  $\beta$   
349 corresponds to the indirect benefit  $b$ , while the fitness loss produced by the prolonged  
350 helper period  $\tau$  is the cost  $c$  of helpers. Then kin selection (i.e., colony level selection)  
351 drives the evolution of extreme morphology and self-sacrificing behavior of soldiers  
352 highly specialized in their defensive tasks (Deligne et al., 1981; Šobotník et al., 2012),  
353 sophisticated pheromonal communication regulating caste differentiation (Matsumura et  
354 al., 1968; Matsuura et al., 2010, 2007; Mitaka et al., 2017), and loss of totipotency, all of  
355 which accelerate the reproductive division of labor.

356 This genomic imprinting theory is based on the fact that genomic imprinting operates  
357 in caste determination of termites, where sexual development of the offspring is  
358 influenced by the sexual phenotypes of parents via transgenerational epigenetic effects  
359 (Matsuura, 2020b; Matsuura et al., 2018). Many molecular agents are known to mediate  
360 genomic imprinting such as DNA methylation, histone modifications, noncoding RNAs  
361 and transcription factors (Ferguson-Smith, 2011; Reik and Walter, 2001). Sex-specific  
362 methylation is a potential mechanism underlying sexual dimorphism in various taxa (Hall  
363 et al., 2014; Pennell and Morrow, 2013), and a recent molecular study demonstrated that  
364 DNA methylation regulates female fecundity in insects (Zhang et al., 2015). In termites,  
365 the level of DNA methylation is known to be considerably higher than in any other social  
366 insect studied to date (Glastad et al., 2016). Future studies are needed to determine the  
367 exact molecular mechanism underlying the genomic imprinting of termites, even though  
368 our conclusion holds irrespective of the exact agents.

369 The current theory to explain the origin of eusociality has the potential for broad  
370 applications to the origin of sterile workers in various diploid animals such as the  
371 ambrosia beetle *Austroplatypus incompertus* (Smith et al., 2018) and the naked mole-rat  
372 *Heterocephalus glaber* (Jarvis, 1981). It remains to be investigated in the future whether  
373 this theory can be extended to the origin of eusocial Hymenoptera, in which the  
374 existence and the role of genomic imprinting in the current caste system are still  
375 controversial. This study shows that transgenerational epigenetic inheritance can play a

376 key role in the inception of eusociality and provides a novel framework for studying the  
377 evolution of social systems in various organisms.

378

#### 379 **Data Availability.**

380 Major simulation data supporting the findings of this study are available within the paper  
381 and Supplementary Information. Simulation data can be generated within the custom-  
382 made code and the parameter sets provided. Custom-made simulation code is available  
383 via GitHub at (<https://github.com/ItoHiromu/Eusoc-Sim>).

384

#### 385 **Acknowledgments.**

386 We thank N.E. Pierce, Y. Iwasa, H. Saze, S. Gavrillets, K. Tsuji, E. Tasaki, T. Ishibashi,  
387 N. Mizumoto and M. Takata for discussions of this topic. K.M. acknowledge financial  
388 support from JSPS through grant 18H05268, 18H05372 and 25221206. E.L.V. was  
389 supported by the Urban Entomology Endowment at Texas A&M University.

#### 390 **References**

- 391 Alexander RD. 1974. The evolution of social behavior. *Annu Rev Ecol Syst* **5**:325–383.  
392 doi:10.2307/2096892
- 393 Bell WJ, Roth LM, Nalepa CA. 2007. Cockroaches: Ecology, Behavior, and Natural  
394 History. Baltimore, MD: The Johns Hopkins University Press.
- 395 Bonduriansky R, Day T. 2008. Nongenetic inheritance and its evolutionary implications.  
396 *Annu Rev Ecol Evol Syst* **40**:103–125.
- 397 Boomsma JJ. 2009. Lifetime monogamy and the evolution of eusociality. *Philos Trans R*  
398 *Soc Lond B Biol Sci* **364**:3191–3207.
- 399 Bourguignon T, Lo N, Cameron SL, Šobotník J, Hayashi Y, Shigenobu S, Watanabe D,  
400 Roisin Y, Miura T, Evans TA. 2015. The evolutionary history of termites as

- 401           inferred from 66 mitochondrial genomes. *Mol Biol Evol* **32**:406–421.  
402           doi:10.1093/molbev/msu308
- 403   Chong S, Whitelaw E. 2004. Epigenetic germline inheritance. *Curr Opin Genet Dev*  
404           **14**:692–696. doi:10.1016/j.gde.2004.09.001
- 405   Cleveland LR, Hall SR, Sanders ER, J. C. 1934. The wood-feeding roach *Cryptocercus*  
406           *punctulatus*, its protozoa, and the symbiosis between protozoa and roach.  
407           *Memoirs of the American Academy of Arts and Sciences* **17**:185–342.
- 408   Darwin C. 1859. On the Origin of Species by Means of Natural Selection, or the  
409           Preservation of Favoured Races in the Struggle for Life. London: John Murray.
- 410   Deligne J, Quennedey A, Blum MS. 1981. The enemies and defense mechanisms of  
411           termites In: Hermann HR, editor. Social Insects Vol.2. New York: Academic  
412           Press New York. pp. 1–76.
- 413   Ferguson-Smith AC. 2011. Genomic imprinting: the emergence of an epigenetic  
414           paradigm. *Nat Rev Genet* **12**:565–575. doi:10.1038/nrg3032
- 415   Gadagkar R. 2000. Do our maternal and paternal genes pull us in different directions?  
416           *Curr Sci* **78**:376–380.
- 417   Glastad KM, Gokhale K, Liebig J, Goodisman MAD. 2016. The caste- and sex-specific  
418           DNA methylome of the termite *Zootermopsis nevadensis*. *Sci Rep* **6**:37110.  
419           doi:10.1038/srep37110
- 420   Hall E, Volkov P, Dayeh T, Esguerra JL ou S, Salö S, Eliasson L, Rönn T, Bacos K, Ling  
421           C. 2014. Sex differences in the genome-wide DNA methylation pattern and

- 422 impact on gene expression, microRNA levels and insulin secretion in human  
423 pancreatic islets. *Genome Biol* **15**:522. doi:10.1186/s13059-014-0522-z
- 424 Hamilton WD. 1964. The genetical evolution of social behaviour. I, II. *J Theor Biol* **7**:1–  
425 52.
- 426 Hölldobler B, Wilson EO. 2009. The superorganism: the beauty, elegance, and  
427 strangeness of insect societies. WW Norton & Company.
- 428 Jablonka E, Raz G. 2009. Transgenerational epigenetic inheritance: prevalence,  
429 mechanisms, and implications for the study of heredity and evolution. *Q Rev Biol*  
430 **84**:131–176. doi:10.1086/598822
- 431 Jacob F. 1977. Evolution and tinkering. *Science*.
- 432 Jarvis JUM. 1981. Eusociality in a mammal: Cooperative breeding in naked mole-rat  
433 colonies. *Science* **212**:571–573. doi:10.1126/science.7209555
- 434 Kay T, Keller L, Lehmann L. 2020. The evolution of altruism and the serial rediscovery of  
435 the role of relatedness. *Proc Natl Acad Sci U S A* **117**:28894–28898.  
436 doi:10.1073/pnas.2013596117
- 437 Klass KD, Nalepa CA, Lo N. 2008. Wood-feeding cockroaches as models for termite  
438 evolution (Insecta : Dictyoptera): *Cryptocercus* vs. *Parasphaeria boleiriana*. *Mol*  
439 *Phylogenet Evol* **46**:809–817. doi:10.1016/j.ympev.2007.11.028
- 440 Korb J. 2008. The ecology of social evolution in termites Ecology of Social Evolution.  
441 doi:10.1007/978-3-540-75957-7\_7
- 442 Legendre F, Nel A, Svenson GJ, Robillard T, Pellens R, Grandcolas P. 2015. Phylogeny  
443 of dictyoptera: Dating the origin of cockroaches, praying mantises and termites

- 444 with molecular data and controlled fossil evidence. *PLoS One* **10**:1–27.  
445 doi:10.1371/journal.pone.0130127
- 446 Matsumura F, Coppel HC, Tai A. 1968. Isolation and identification of termite trail-  
447 following pheromone. *Nature* **219**:963–964.
- 448 Matsuura K. 2020a. Epigenetic inheritance and a paradigm shift in evolutionary ecology.  
449 *Popul Ecol* **62**:15–16. doi:10.1002/1438-390x.12034
- 450 Matsuura K. 2020b. Genomic imprinting and evolution of insect societies. *Popul Ecol*  
451 **62**:38–52. doi:10.1002/1438-390x.12026
- 452 Matsuura K. 2017. Evolution of the asexual queen succession system and its underlying  
453 mechanisms in termites. *J Exp Biol* **220**:63–72. doi:10.1242/jeb.142547
- 454 Matsuura K, Himuro C, Yokoi T, Yamamoto Y, Vargo EL, Keller L. 2010. Identification of  
455 a pheromone regulating caste differentiation in termites. *Proc Natl Acad Sci U S*  
456 *A* **107**:12963–12968. doi:10.1073/pnas.1004675107
- 457 Matsuura K, Mizumoto N, Kobayashi K, Nozaki T, Fujita T, Yashiro T, Fuchikawa T,  
458 Mitaka Y, Vargo EL. 2018. A genomic imprinting model of termite caste



- 459           determination: Not genetic but epigenetic inheritance influences offspring caste  
460           fate. *Am Nat* **191**:677–690. doi:10.1086/697238
- 461   Matsuura K, Tamura T, Kobayashi N, Yashiro T, Tatsumi S. 2007. The antibacterial  
462           protein lysozyme identified as the termite egg recognition pheromone. *PLoS One*  
463           **2**:e813. doi:10.1371/journal.pone.0000813
- 464   Matsuura K, Vargo EL, Kawatsu K, Labadie PE, Nakano H, Yashiro T, Tsuji K. 2009.  
465           Queen succession through asexual reproduction in termites. *Science* **323**:1687.  
466           doi:10.1126/science.1169702
- 467   Mitaka Y, Mori N, Matsuura K. 2017. Multi-functional roles of a soldier-specific volatile as  
468           a worker arrestant, primer pheromone and an antimicrobial agent in a termite.  
469           *Proc R Soc B* **284**:20171134. doi:10.1098/rspb.2017.1134
- 470   Müller GB, Wagner GP. 1991. Novelty in evolution: Restructuring the concept. *Annu Rev*  
471           *Ecol Syst* **22**:229–256. doi:10.1146/annurev.es.22.110191.001305
- 472   Nalepa CA. 2015. Origin of termite eusociality: Trophallaxis integrates the social,  
473           nutritional, and microbial environments. *Ecol Entomol* **40**:323–335.  
474           doi:10.1111/een.12197
- 475   Nalepa CA. 2010. Altricial development in subsocial cockroach ancestors: foundation for  
476           the evolution of phenotypic plasticity in termites. *Evol Dev* **12**:95–105.  
477           doi:10.1111/j.1525-142X.2009.00394.x
- 478   Nalepa CA. 1994. Nourishment and the origin of termite eusociality In: Hunt JH, Nalepa  
479           CA, editors. *Nourishment and Evolution in Insect Societies*. Boulder, CO, USA:  
480           Westview Press. pp. 57–104.
- 481   Nalepa CA. 1988. Cost of parental care in the woodroach *Cryptocercus punctulatus*  
482           Scudder (Dictyoptera: Cryptocercidae). *Behav Ecol Sociobiol* 135–140.
- 483   Nalepa CA. 1984. Colony composition, protozoan transfer and some life history  
484           characteristics of the woodroach *Cryptocercus punctulatus* Scudder (Dictyoptera:  
485           Cryptocercidae). *Behav Ecol Sociobiol* **14**:273–279. doi:10.1007/BF00299498
- 486   Nowak MA, Tarnita CE, Wilson EO. 2010. The evolution of eusociality. *Nature*  
487           **466**:1057–1062. doi:10.1038/nature09205

- 488 Pál C, Miklós I. 1999. Epigenetic Inheritance, Genetic Assimilation and Speciation. *J*  
489 *Theor Biol* **200**:19–37. doi:10.1006/jtbi.1999.0974
- 490 Pennell TM, Morrow EH. 2013. Two sexes, one genome: The evolutionary dynamics of  
491 intralocus sexual conflict. *Ecol Evol* **3**:1819–1834. doi:10.1002/ece3.540
- 492 Reik W, Walter J. 2001. Genomic imprinting: parental influence on the genome. *Nat Rev*  
493 *Genet* **2**:21–32. doi:10.1038/35047554
- 494 Rice WR, Friberg U, Gavrillets S. 2016. Sexually antagonistic epigenetic marks that  
495 canalize sexually dimorphic development. *Mol Ecol* **25**:1812–1822.
- 496 Rice WR, Friberg U, Gavrillets S. 2012. Homosexuality as a consequence of  
497 epigenetically canalized sexual development. *Q Rev Biol* **87**:343–368.
- 498 Smith SM, Kent DS, Boomsma JJ, Stow AJ. 2018. Monogamous sperm storage and  
499 permanent worker sterility in a long-lived ambrosia beetle. *Nature Ecology and*  
500 *Evolution* **2**:1009–1018. doi:10.1038/s41559-018-0533-3
- 501 Šobotník J, Bourguignon T, Hanus R, Demianová Z, Pytelková J, Mareš M, Foltynová P,  
502 Preisler J, Cvačka J, Krasulová J, Roisin Y. 2012. Explosive backpacks in old  
503 termite workers. *Science* **337**:436. doi:10.1126/science.1219129
- 504 Thorne BL. 1997. Evolution of eusociality in termites. *Annu Rev Ecol Syst* **28**:27–54.
- 505 Trumbo ST. 2013. Maternal care, iteroparity and the evolution of social behavior: A  
506 critique of the semelparity hypothesis. *Evol Biol* **40**:613–626.  
507 doi:10.1007/s11692-013-9237-4
- 508 West-Eberhard M. 1975. The evolution of social behavior by kin selection. *Q Rev Biol*  
509 **50**:1–33.
- 510 Wilson EO. 1971. The insect societies. Cambridge, MA: Harvard University Press.
- 511 Wilson EO, Hölldobler B. 2005. Eusociality: Origin and consequences. *Proc Natl Acad*  
512 *Sci U S A* **102**:13367–13371. doi:10.1073/pnas.0505858102
- 513 Zhang J, Xing Y, Li Y, Yin C, Ge C, Li F. 2015. DNA methyltransferases have an  
514 essential role in female fecundity in brown planthopper, *Nilaparvata lugens*.  
515 *Biochem Biophys Res Commun* **464**:83–88. doi:10.1016/j.bbrc.2015.05.114  
516

517 **Figures**

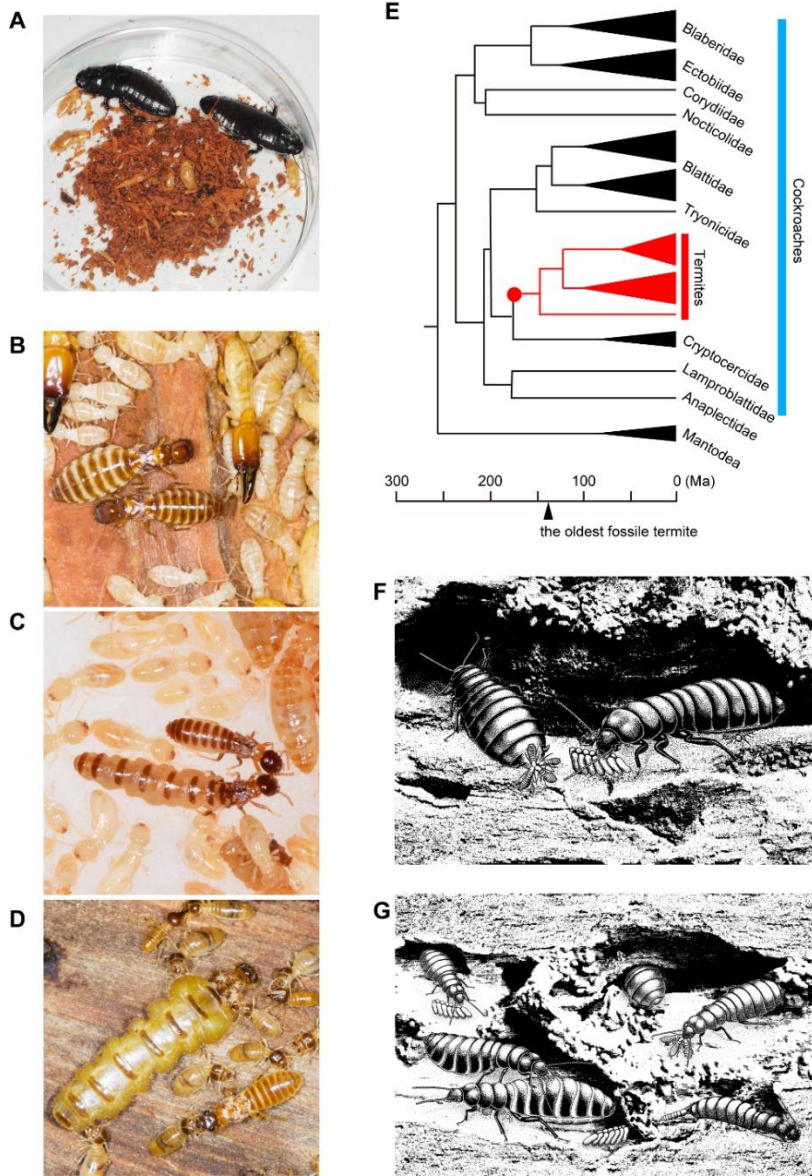

518

519 **Figure 1. Termite eusociality originated from a lineage of subsocial woodroach.**  
 520 (A) Monogamy in a woodroach *Cryptocercus punctulatus*, which is an oviparous  
 521 cockroach with biparental care. (B-D) A primary king (PK) and a primary queen (PQ) of a  
 522 damp-wood termite *Zootermopsis nevadensis*, a subterranean termite *Reticulitermes*  
 523 *speratus* and a higher termite *Nasutitermes takasagoensis*, respectively. (E)  
 524 Phylogenetic placement of termites. Termites are a sister group of Cryptoceridae. (F,  
 525 G) Imaginary illustration of the incipient colony (F) and a developed family (G) of the first  
 526 termite. The founder female produces a packaged egg mass as in the basal termite  
 527 *Mastotermes darwiniensis*. The first brood helpers contribute to the production of  
 528 younger sibs through wood excavation, trophallaxis, allogrooming, nest hygiene and so  
 529 on. Photos by K.M. Illustrations by H.O and K.M.  
 530

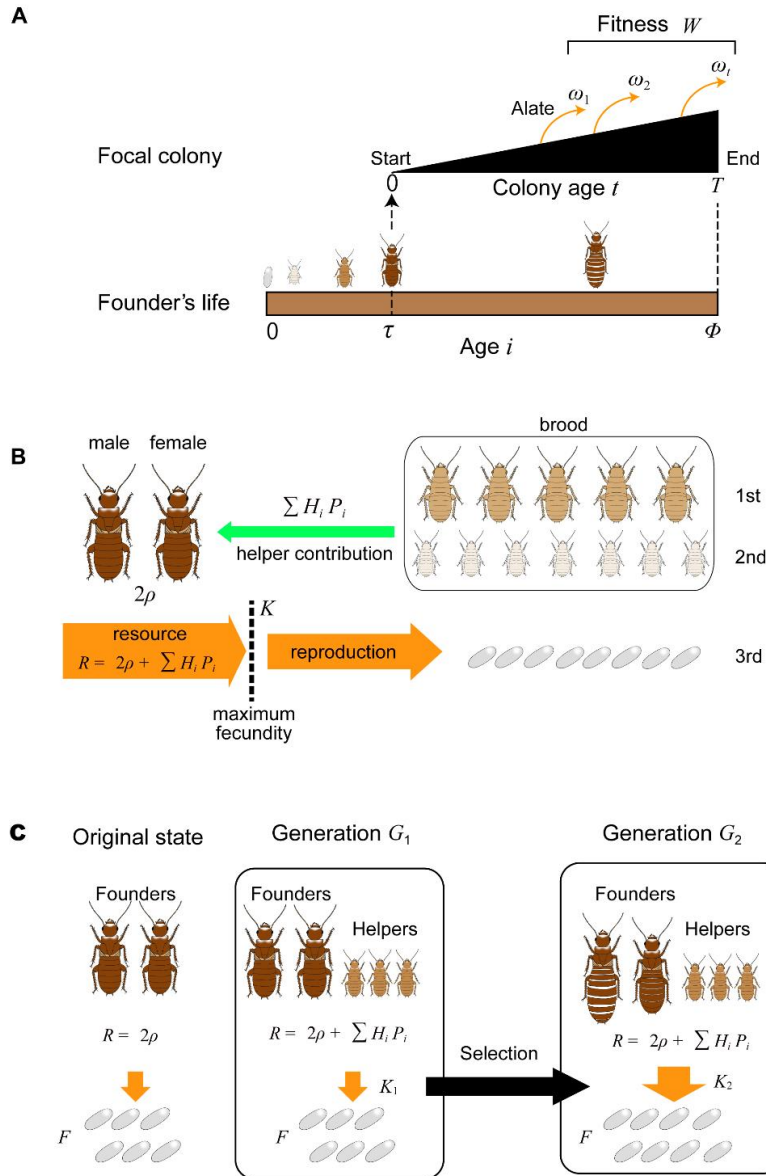

531

532 **Figure 2. Schematic view of the model life cycle of a subsocial ancestor of**  
 533 **termites just before the origin of eusociality.** (A) Colony life cycle. Individuals  
 534 become alates (imagoes) and leave their natal nest at age  $\tau$ . They disperse and  
 535 establish new colonies by pairing with an unrelated individual. The colony produces  
 536 alates  $\omega_t$  at colony age  $t$ . Total number of alates produced  $W$  during the colony lifespan  
 537  $(\Phi - \tau)$  is defined as the fitness of the focal colony. (B) Presence of older brood in the  
 538 nest contributes to resource acquisition of parents. (C), Additional resources can be a  
 539 selective force for the evolution of higher fecundity of founders. Without helpers, the  
 540 founders reproduce by using their own resources  $2\rho$  (left). Even if there were additional  
 541 resources from the helpers' contributions, the founders would not be able to use them for  
 542 reproduction due to the upper limit of their fecundity  $K_1$  (center). Selection favors higher  
 543 fecundity  $K_2$  of the founders so as to fully utilize the additional resources for reproduction  
 544 (right). See also Figs. S5 and S6 for the detailed scheme. Illustrations by K.M.  
 545

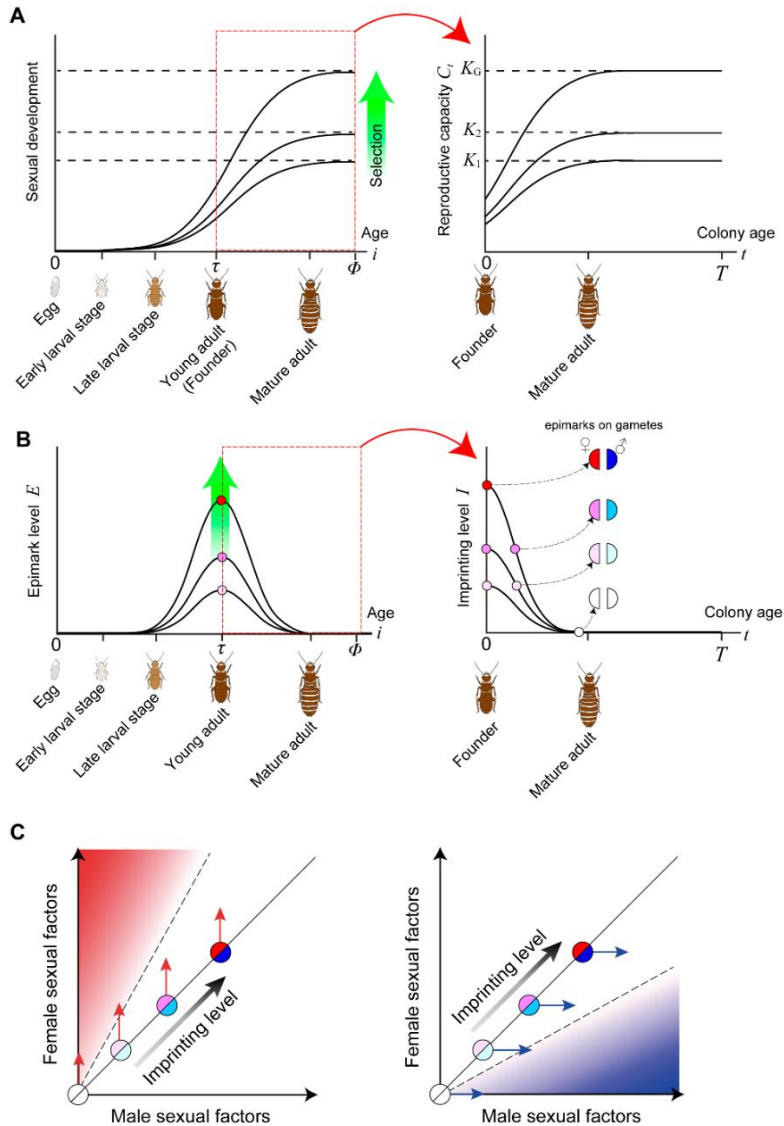

546

547 **Figure 3. The genomic imprinting model for the origin of eusociality.** Sex-  
 548 antagonistic action of maternally- and paternally-inherited epimarks retains the offspring  
 549 in the neuter state. (A) Sexual development of individuals (left) and reproductive capacity  
 550 of founders  $C_t$  (right). (B) Development of epimarks in relation to sexual development of  
 551 the parents (left) and unerased sex-specific epimarks that carryover to the next  
 552 generation through gametes (right). Reproductive capacity of the parents  $C_t$  is acquired  
 553 through canalization of the expression of sexual development genes through epigenetic  
 554 modification  $E_t$ . Therefore,  $E_t$  is expressed as the derivative of  $C_t$ ,  $E_t = \frac{dC_t}{dt}$ . Blue and  
 555 red semicircles indicate paternally- and maternally-inherited epimarks, respectively.  
 556 Darkness of the color represents the strength of epimarks. (C) Antagonistic action of  
 557 maternal and paternal imprinting in the offspring. Illustrations by K.M.

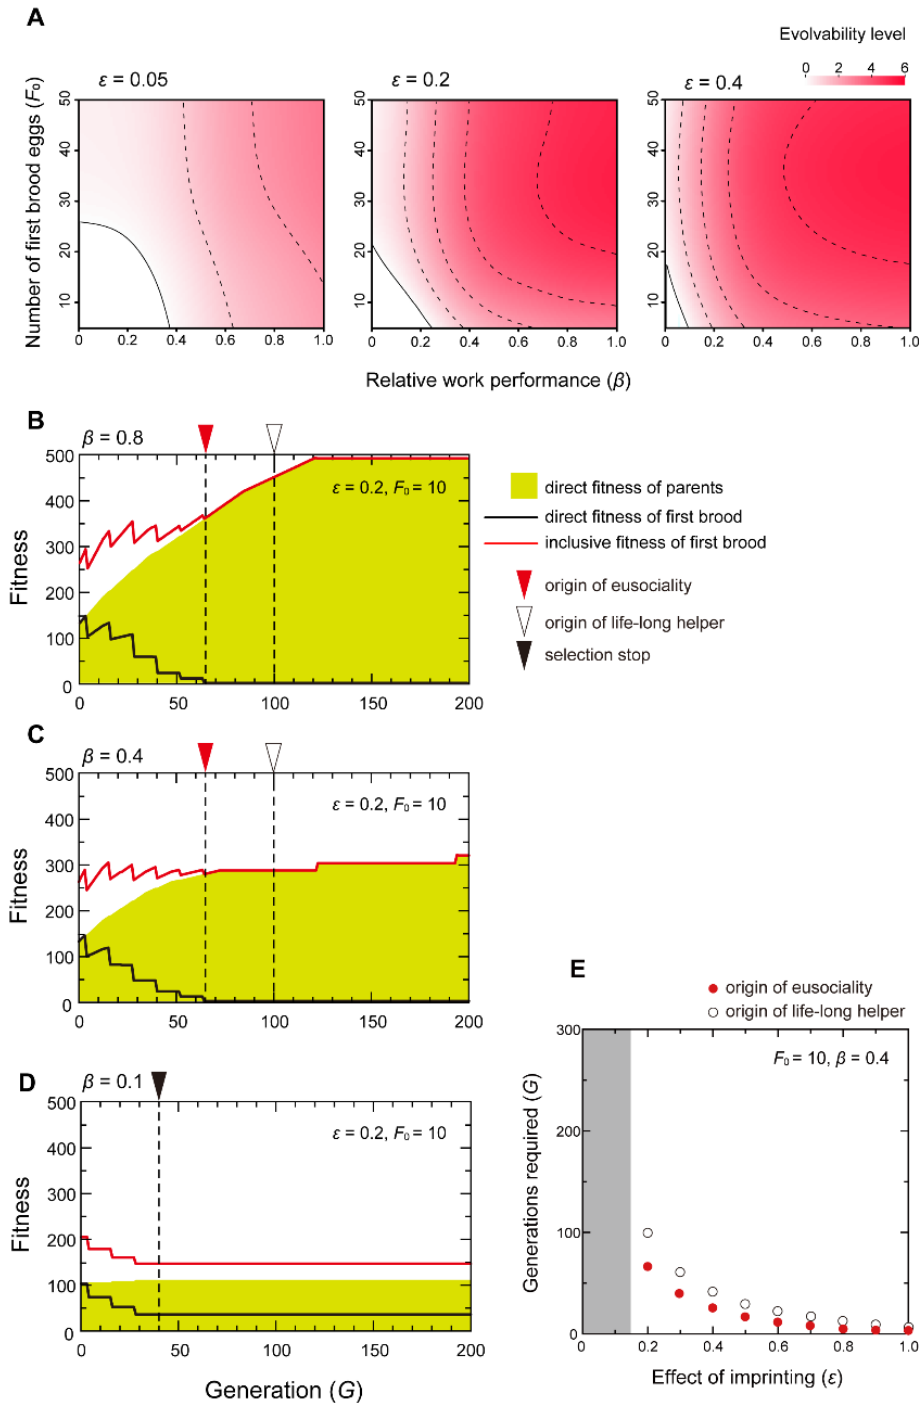

558

559 **Figure 4. Evolvability of eusociality.** (A) The effect of work performance of helpers  $\beta$   
 560 and initial fecundity of the parents  $F_0$  on the evolvability of eusociality. Eusociality is  
 561 easily achieved under high epimark transmission rate  $\epsilon$  and/or high work performance of  
 562 helpers  $\beta$ . Evolvability level is evaluated by the level of eusociality acquisition (indicated  
 563 by the intensity of red color) when colony longevity  $T$  is varied from 10 to 15 years (Level  
 564 0: no acquisition; level 6: acquisition under all  $T$  cases). Eusociality acquisition is defined  
 565 as the appearance of a helper with no direct fitness (inclusive fitness only). (B-D) Fitness

566 dynamics of the parents and the first brood offspring under different work performance  
567 levels of helpers  $\beta$  ( $T = 13$ ,  $\varepsilon = 0.2$ ,  $F_0 = 10$ ). Green area indicates the direct fitness of  
568 parents (the number of alates produced by a colony). Black and red lines indicate the  
569 direct and inclusive fitness of the first brood, respectively. Red arrowheads indicate the  
570 origin of eusociality (the appearance of a helper with no direct fitness). Open arrowheads  
571 indicate the appearance of a lifelong helper. Black arrowheads indicate the point when  
572 selection stops, i.e., the direct fitness of the parents decreases from that of the previous  
573 generation in numerical calculation. (E) Effect of genomic imprinting level  $I_t$  (i.e.,  $\varepsilon$  for a  
574 given  $E_t$ ) on the generation required to reach eusociality. Red and open circles indicate  
575 the origin of eusociality and the appearance of a lifelong helper, respectively. Gray area  
576 indicates the region where eusociality is not achieved.  
577

578 **Supplementary Information for**

579 **Genomic imprinting drives eusociality**

580

581 Kenji Matsuura<sup>1,##</sup>, Hiromu Ito<sup>2,#</sup>, Kazuya Kobayashi<sup>3</sup>, Haruka Osaki<sup>4</sup>, Jin Yoshimura<sup>2</sup>, Edward L.  
582 Vargo<sup>5</sup>

583 <sup>1</sup>Laboratory of Insect Ecology, Graduate School of Agriculture, Kyoto University, Kyoto, Japan. <sup>2</sup>  
584 Department of International Health and Medical Anthropology, Institute of Tropical Medicine,  
585 Nagasaki University. Nagasaki, Japan. <sup>3</sup>Hokkaido Forest Research Station, Field Science  
586 Education and Research Center, Kyoto University, Shibecha, Hokkaido, Japan. <sup>4</sup>Department of  
587 Biology, Kyushu University, Fukuoka, Japan. <sup>5</sup>Department of Entomology, Texas A&M University,  
588 College Station, TX, USA. #These authors contributed equally.

589 \*Kenji Matsuura

590 **Email:** matsuura.kenji.6s@kyoto-u.ac.jp

591

592

593 **This PDF file includes:**

594

595       Supplementary text

596           1. Transgenerational epigenetic inheritance; a paradigm shift in biology

597           2. Genomic imprinting as a carryover effect of parental epimarks

598           3. Asexual queen succession in termites

599           4. Genomic imprinting in termites

600           5. Additional model explanation: work performance of helpers

601

602       Figures S1 to S7

603       Tables S1 to S2

604       SI References

605

606

607

608



## 609 **Backgrounds**

610 We here introduce the latest studies on the transgenerational epigenetic inheritance and genomic  
611 imprinting in termites following the recent review by Matsuura (Matsuura, 2020).

612

### 613 **1. Transgenerational epigenetic inheritance; a paradigm shift in biology**

614 Evolution by natural selection requires phenotypic variation, inheritance and selection forces.  
615 Charles Darwin conceived the theory of natural selection without knowing the agent of  
616 inheritance. Biology is traditionally dominated by the idea of genetic determinism, which is  
617 focused almost exclusively on genetic inheritance and processes that change gene frequencies.  
618 Recent empirical studies have convincingly demonstrated transgenerational epigenetic  
619 inheritance in various eukaryotic organisms including yeasts (Grewal and Klar, 1996), plants  
620 (Hauser et al., 2011; Miryeganeh and Saze, 2020) nematodes (Remy, 2010; Seroby and  
621 Sommer, 2017), mammals (Daxinger and Whitelaw, 2012; Perez and Lehner, 2019) and insects  
622 (Mukherjee and Vilcinskas, 2019). The transfer of epigenetic marks from parents to offspring can  
623 influence offspring phenotype independent of the DNA sequence (Bonduriansky and Day, 2008).  
624 The concept of epigenetic inheritance provides solutions for many previously-unsolved puzzles by  
625 circumventing the limitation of genetic inheritance (Bonduriansky and Day, 2008; Jablonka and  
626 Raz, 2009; Szyf, 2014). Theoretical studies indicate that epigenetic inheritance is an important  
627 factor in evolution that can produce outcomes that are not anticipated under traditional genetics.  
628 Therefore, it is apparent that biology is in a major transitional period that will take it forward from  
629 the previously narrow perspective.

630 Over the past decade there has been a rapid accumulation of definitive evidence for the  
631 molecular mechanisms underlying transgenerational epigenetic inheritance (Greer and Shi, 2012;  
632 Liberman et al., 2019; Martin and Zhang, 2007; Miska and Ferguson-smith, 2016; Moazed, 2011).  
633 In principle, any molecular change in the zygote other than alterations in DNA sequence could  
634 carry non-genetic information including DNA methylation, histone modification, non-coding RNA,  
635 prions and microbiota.

636

### 637 **2. Genomic imprinting as a carryover effect of parental epimarks**

638 The effects of transgenerational epigenetic inheritance on offspring are often sex-specific  
639 (Bonduriansky and Day, 2008; Vigé et al., 2008). A phenomenon related to transgenerational  
640 epigenetic inheritance is genomic imprinting, whereby epimark transmission depends on parental  
641 sex, resulting in parent-of-origin allelic expressions (Gregg et al., 2010; Lawson et al., 2013; Xu et  
642 al., 2014). Recent evidence also suggests that imprinting effects can depend on offspring sex  
643 (Hager et al., 2008).

644 Kinship theory of genomic imprinting focuses on a conflict (Haig, 2014) between the maternal  
645 and paternal genes (see also Holman & Kokko (Holman and Kokko, 2014) and Patten et al.  
646 (Patten et al., 2014)). Genomic imprinting can occur as a by-product of another advantageous  
647 process such as retrotransposon silencing (Suzuki et al., 2007) or canalization of sexually  
648 dimorphic development (Rice et al., 2012) even if imprinting itself has no fitness advantage. The  
649 most parsimonious mechanistic explanation for the origin of genomic imprinting would be  
650 incomplete erasure of epigenetic modifications, i.e., carryover effects of parental epimarks  
651 (Chong and Whitelaw, 2004; Kearns et al., 2000; Rice et al., 2016). Although epigenetic  
652 modifications acquired by parents are mostly erased during gametogenesis, which allows  
653 reestablishment of epigenetic marks in the next generation, a portion of epigenetic modifications  
654 can be inherited through the germline in a wide variety of taxa including mammals (Anway et al.,

655 2005; Morgan and Bale, 2011), insects (Cavalli and Paro, 1998), yeast (Grewal and Klar, 1996)  
656 and plants (Miryeganeh and Saze, 2020).

657 The degree of sexual dimorphism will be associated with the degree of sex-specific  
658 epigenetic modifications (Deegan and Engel, 2019). Selection favoring a higher degree of sexual  
659 dimorphism would lead to a higher imprinting level, if the efficiency of erasure is not changed.  
660 This carryover effect of sex-specific parental epimarks on the offspring's development can  
661 contribute to the determination of the phenotype (Matsuura et al., 2018; Rice et al., 2013, 2012).

662

### 663 **3. Asexual queen succession in termites**

664 Transgenerational epigenetic inheritance and genomic imprinting have been attracting more and  
665 more attention in the study of insects because many phenomena involving non-genetic  
666 inheritance have been found in a number of insect species (Galbraith et al., 2016; Gegner et al.,  
667 2019; Matsuura, 2020; Mukherjee and Vilcinskis, 2019). In particular, the effects of parental  
668 phenotypes on the caste fate of offspring have been discovered in termites, which provides  
669 definitive evidences for non-genetic inheritance (Matsuura et al., 2018). A unique reproductive  
670 system named Asexual Queen Succession (AQS) has been identified in several termite species,  
671 in which workers, soldiers and alates are produced sexually while neotenic queens arise through  
672 thelytokous parthenogenesis and eventually replace the old queens (Hellemans and Roisin,  
673 2020; Matsuura, 2017; Matsuura et al., 2009) (Fig. S1). Then, neotenic queens are replaced by  
674 subsequent cohorts of asexually-produced neotenic queens. Therefore, as long as the colonies  
675 survive, the queens are genetically immortal. This is advantageous for both the queens and other  
676 colony members because queens can boost reproduction without inbreeding.

677 After the first report of AQS in the Japanese subterranean termite *R. speratus* (Matsuura et  
678 al., 2009), AQS has been continuously found in other *Reticulitermes* species in other continents:  
679 *R. virginicus* in the US (Vargo et al., 2012) and *R. lucifugus* in Italy (Luchetti et al., 2013). Time-  
680 scaled phylogeny of the genus *Reticulitermes* demonstrated that AQS was absent in the basal  
681 lineage but has evolved at least three times independently, in East Asia (ca. 7-5 million years  
682 ago), in West Europe (ca. 10-5 million years ago) and in North America (less than 14.1 million  
683 years ago) (Dedeine et al., 2016). Recent surveys of the breeding systems of higher termites  
684 (Termitidae) in French Guiana have repeatedly identified AQS in Neotropical termitids including  
685 *Embiratermes neotenicus* (Syntermitinae) (Fougeyrollas et al., 2015), the humivorous termite  
686 *Cavitermes tuberosus* (Termitinae) (Fournier et al., 2016), *Silvestritermes minutus*  
687 (Syntermitinae) (Fougeyrollas et al., 2017) and *Palmitermes impostor* (Termitinae) (Hellemans et  
688 al., 2019). In all of these seven AQS species, the asexual neotenic queens derive from nymphs,  
689 i.e., the sexual pathway.

690 Why has AQS evolved repeatedly in phylogenetically distant lineages? The origin of AQS  
691 requires the simultaneous evolution of two distinct traits: parthenogenetic capacity and the  
692 developmental priority for parthenogenetic daughters to develop into secondary queens. Then a  
693 question emerges as to why parthenogenetic daughters and sexually-produced daughters differ  
694 in their developmental propensity. Nozaki et al. (2018) asked if in a non-AQS species, *R.*  
695 *okinawanus*, the female offspring produced by tycho-parthenogenesis (i.e., occasional  
696 parthenogenesis) differentiate into secondary queens (Nozaki et al., 2018). Interestingly a  
697 significantly higher proportion of parthenogenetic daughters developed into neotenic queens  
698 (nymphoid queens) than sexually produced females (Nozaki et al., 2018). This suggest that the  
699 developmental propensity of parthenogenetic daughters to become neotenic queens existed prior  
700 to the origin of AQS, which could explain why AQS evolved repeatedly in phylogenetically distant  
701 lineages.

702

#### 703 **4. Genomic imprinting in termites**

704 Influence of parental phenotypes on the caste fate of offspring is known in the genus  
705 *Reticulitermes* (Hayashi et al., 2007; Kitade et al., 2010). For instance, the daughters produced  
706 by queens' parthenogenesis and the daughters produced by the mating of nymph-derived queens  
707 and worker-derived males develop exclusively into nymphs. On the other hand, most of the  
708 daughters produced by the mating of worker-derived queens and nymph-derived males develop  
709 into workers. The theory of genomic imprinting explains the effects of parental phenotypes on  
710 caste fate of the offspring (Matsuura et al., 2018). Its prediction matches exactly with empirical  
711 data from both lab and field studies.

712 As shown in the scheme (Fig. S2), the theory of genomic imprinting consists of two stages: 1)  
713 development of phenotype-specific parental epimarks and 2) influence of parental imprinting on  
714 the development of offspring. Nymph-derived reproductives obtain higher levels of epimarks so  
715 as to canalize expression of sexual characters than ergatoids (worker-derived reproductives) (Fig.  
716 S2A). Then the maternally- and paternally-inherited epimarks influence the relative expression of  
717 growth regulatory genes ( $\epsilon_g$ : growth factors) to sex regulatory genes ( $\epsilon_s$ : sexual factors), and thus  
718 determine the caste fate of offspring (Fig. S2B). Growth with sexual development directs  
719 individuals to the sexual pathway (nymphs), while growth without sexual development restricts  
720 individuals to the neuter caste (workers). The double maternal imprinting of parthenogenetic  
721 daughters leads them to the sexual pathway in AQS species.

722 The predictions of genomic imprinting model match well both with the caste differentiation  
723 patterns of the AQS species *R. speratus* (Hayashi et al., 2007) (Fig. S2B) and those of the non-  
724 AQS species *R. kanmonensis*, *R. yaeyamanus* and *R. okinawanus* (Kitade et al., 2010). Genomic  
725 imprinting clearly explains why the daughters carrying only maternal chromosomes have the  
726 developmental propensity to become neotenic queens rather than daughters carrying both  
727 paternal and maternal chromosomes.

728 Genomic imprinting explains why parthenogens carrying only maternal chromosomes pre-  
729 adaptively have the epigenetic and thus developmental advantage to become neotenic queens  
730 (Matsuura et al., 2018; Nozaki et al., 2018). Many factors are known to mediate genomic  
731 imprinting such as DNA methylation, histone modifications, noncoding RNAs and transcription  
732 factors (Ferguson-Smith, 2011; Reik and Walter, 2001). The DNA methylation levels in termites  
733 are considerably higher than other hemimetabolous insects (Harrison et al., 2018). Moreover,  
734 termites shows caste- and sex-specific DNA methylation patterns (Glastad et al., 2016). The DNA  
735 methyltransferases DNMT1 and DNMT3 are known to be involved in maintenance of and  
736 mediating *de novo* DNA methylation, respectively (Goll and Bestor, 2005; Yan et al., 2015). RNA-  
737 seq analysis of *R. speratus* revealed sex- and caste-dependent expression patterns of the DNA  
738 methyltransferases, where alates have higher expression of *Dnmt1* than workers in females but  
739 not in males. Alates also showed significantly higher expression of *Dnmt3* than workers in males  
740 but not in female (Mitaka et al., 2020). These results seem to support the theory of genomic  
741 imprinting.

742

#### 743 **5. Additional model explanation**

744 **Work performance of helpers.** Within-nest iteroparity creates the overlapping broods within a  
745 colony, which provides the opportunity for older brood to contribute to the production and growth of  
746 younger sibs (Thorne, 1997). The presence of older brood is advantageous for the parents and  
747 younger sibs rather than imposing a deleterious effect because they provide nest excavation,  
748 trophallaxis, allogrooming, defense and other forms of brood care. Therefore, we can reasonably  
749 expect a high work performance  $\beta$  of the helpers in the subsocial ancestral state.

750 Work performance  $P_i$  (J/year) of a helper offspring increases with age  $i$ . Eggs (0-year-old) and  
751 1-year-old larvae cannot contribute to social labor. Offspring older than 5-years achieve their

752 maximum possible performance  $\beta \cdot \rho$ , where  $\beta$  is the relative work efficiency of helpers compared  
753 to the work performance of a parent  $\rho$ . If  $\beta$  is 1, mature helpers have the same work performance  
754 as a parent. 2-4 year old offspring have intermediate performance. Thus the helper performance  
755  $P_i$  of a helper at age  $i$  (year) is given by (Fig. S3)

756

$$757 \quad P_i = \begin{cases} 0 & (i = 0) \\ \frac{\beta \rho^{(i-1)}}{4} & (1 \leq i \leq 5) \\ \beta \rho & (i > 5) \end{cases} \quad (\text{S1})$$

758

759

760 We also investigated the effect of the curvatures  $s$  of age-dependent increase in work  
761 performance  $P_i$  on the origin of eusociality (Fig. S4),

762

$$763 \quad P_i = \begin{cases} 0 & (i = 0, 1) \\ \frac{\beta \cdot \rho}{4} (1 - s) & (i = 2) \\ \frac{\beta \cdot \rho}{2} & (i = 3) \\ \frac{\beta \cdot \rho}{4} (3 + s) & (i = 4) \\ \beta \cdot \rho & (5 \leq i) \end{cases} \quad (\text{S2})$$

764

765 There is no qualitative change in the outcome when the curvatures  $s$  varies from 0 to 1 (the  
766 results were omitted).

767

768

769

770

771

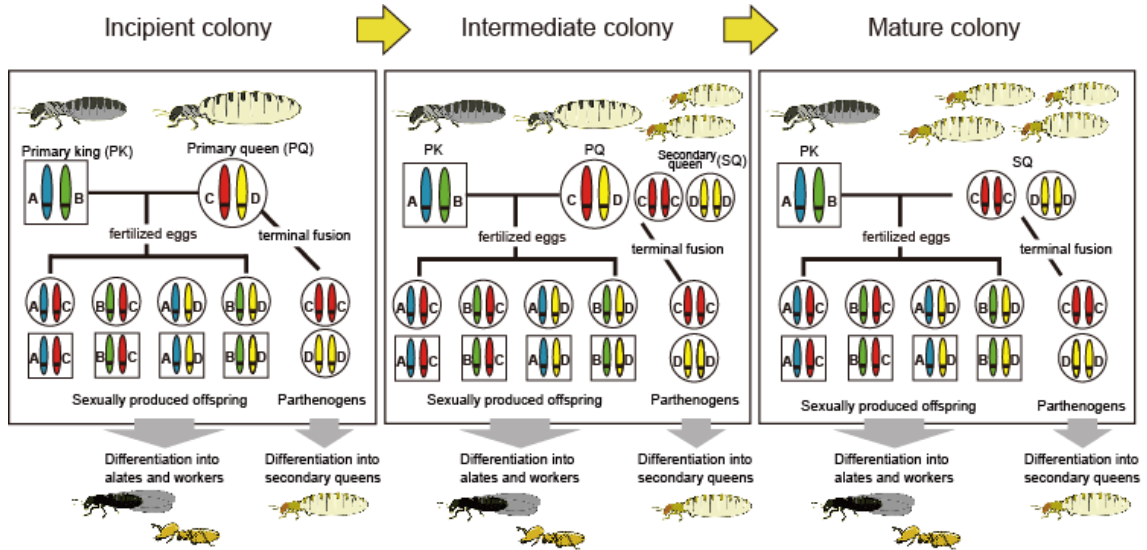

772

773

774 **Fig. S1. Asexual queen succession in termites.** Secondary queens produced asexually by the  
775 primary queen differentiate within the colony and supplement egg production, eventually,  
776 replacing the primary queen (Matsuura, 2017; Matsuura et al., 2009). This breeding system  
777 enables the primary queen to maintain her full genetic contribution to the next generation, while  
778 avoiding any loss in genetic diversity from inbreeding.

779

780

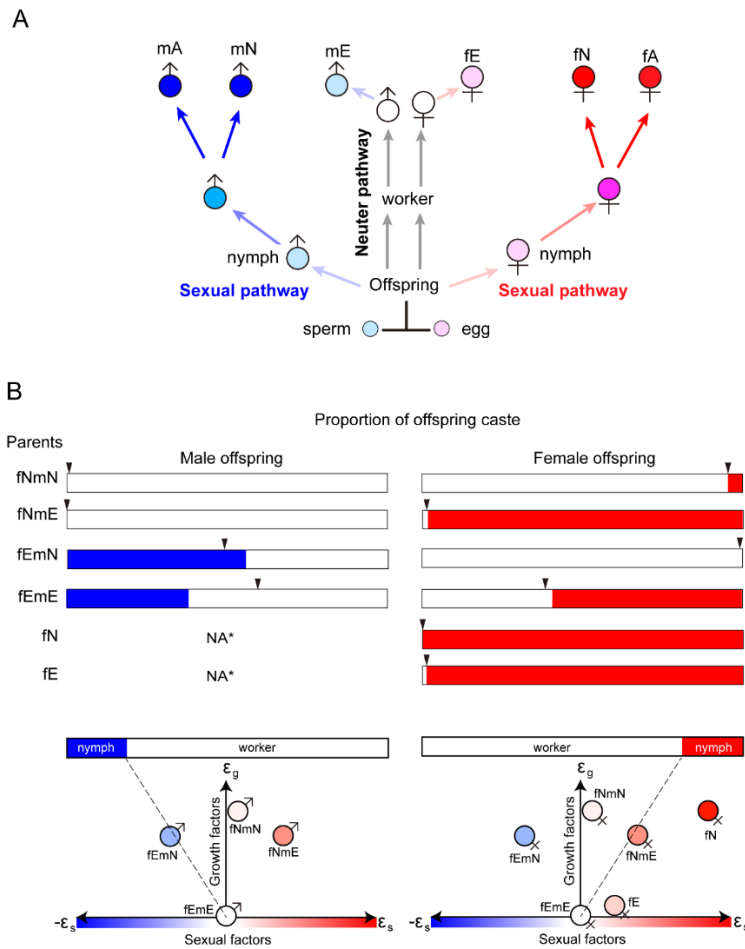

781

782

783 **Fig. S2. Genomic imprinting and caste determination in termites.** (A) Caste differentiation  
 784 and establishment of sex-specific epimarks. Alates (male: mA; female: fA) and nymphoids (male:  
 785 mN; female: fN) develop with the full canalization of sexual development, while ergatoids (male:  
 786 mE; female: fE) develop by a single sexual molt. Blue and red arrows indicate the development of  
 787 male- and female-specific epimarks, respectively, and darkness of the color represents the  
 788 strength of epimarks. (B) Combination of parental phenotypes and outcome of offspring caste  
 789 (e.g., fEmN: female ergatoid and male nymphoid). The caste differentiation patterns predicted by  
 790 the genomic imprinting model (bar graphs) and the empirical results (arrowheads) of *R. speratus*  
 791 (Hayashi et al., 2007). \*Parthenogenesis produces only female offspring. Expression levels of  
 792 growth regulatory genes ( $\epsilon_g$ ) and sexual regulatory genes ( $\epsilon_s$ ) of the male- and female-offspring.  
 793 Modified from Matsuura et al. (Matsuura et al., 2018).

794

795

796

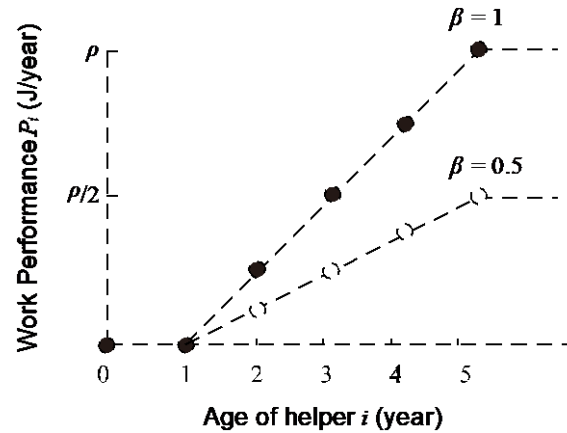

797

798

799 **Fig. S3. Relationship between age and work performance of helpers.** Work performance  $P_i$   
800 (J/year) of a helper increases with age  $i$  (year), where 0-year-old and 1-year-old helpers do not  
801 contribute to social labor. Offspring older than 5 years achieve their maximum possible  
802 performance  $\beta \cdot \rho$ , where  $\beta$  is the relative work efficiency of helpers to the work performance of a  
803 parent  $\rho$ . If  $\beta$  is 1, mature helpers (offspring older than 5 years) have the same work performance  
804 as a parent (closed circles). The 2-4 year old offspring have intermediate performance levels.  
805 Hence, the work performance  $P_i$  of a helper at age  $i$  (year) is given by Equation (S1).

806

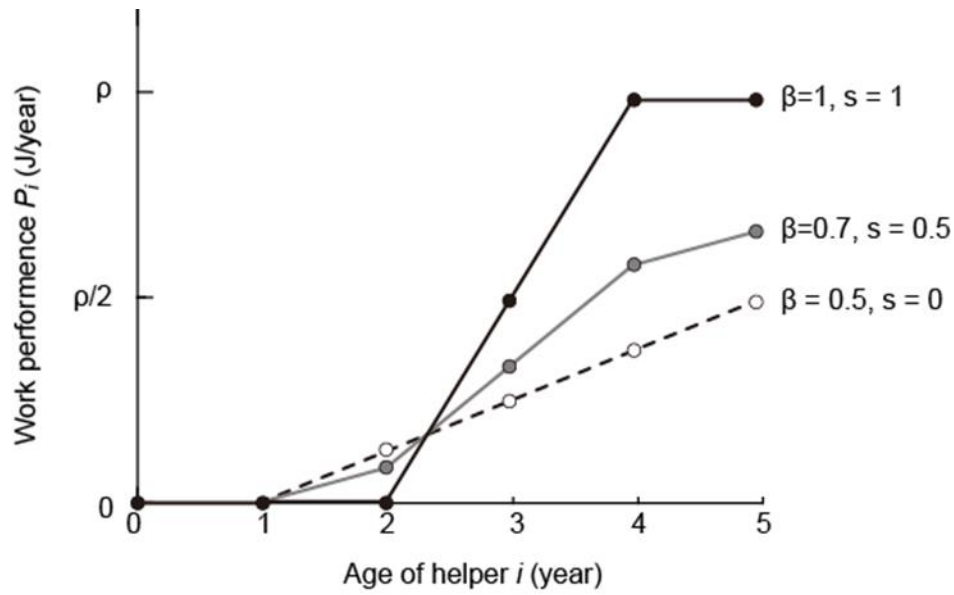

807

808

809 **Fig. S4. Relationship between age and work performance of helpers.** The work performance  
810  $P_i$  of a helper at age  $i$  (year) is given by Equation (S2).

811

812

813



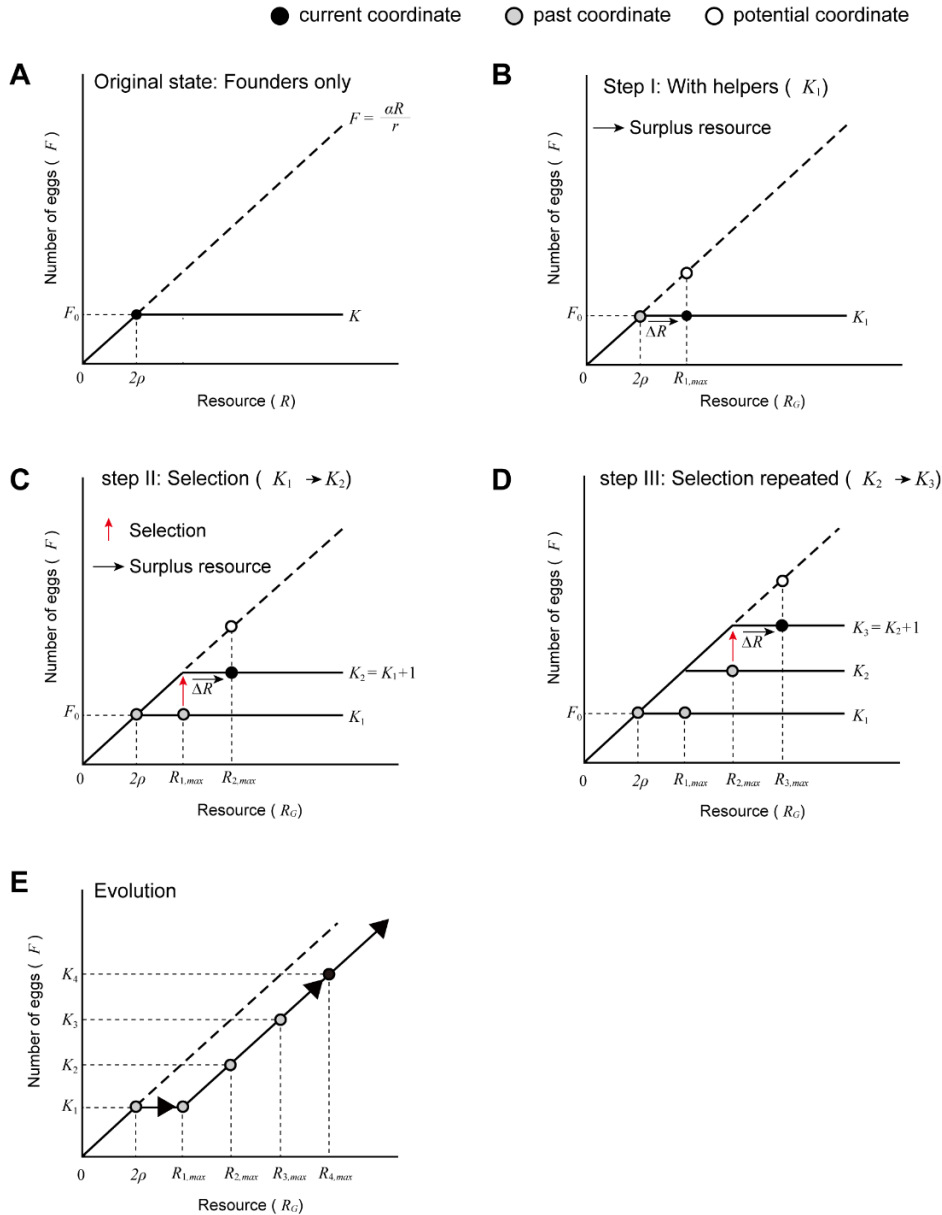

814

815 **Fig. S5. Selection scheme.** (A) Original state. Without helpers, the founders reproduce by using  
 816 their own resources  $2\rho$ . A monogamous pair of a male and a female produce  $F_0$  eggs using their  
 817 own resources  $2\rho$ . (B) Step I (generation  $G_1$ ). Presence of helpers contribute to social labor, which  
 818 increases the resources available  $\Delta R$  for egg production. Nevertheless, the parents can produce  
 819 only  $F_0$  eggs because of limitations on maximum reproductive capacity  $K_1$ . (C) Step II (generation  
 820  $G_2$ ). Selection favors higher reproductive capacity of the parents so as to fully utilize the available  
 821 resources ( $K_1 \rightarrow K_2$ ). Acquisition of greater reproductive potential is derived from higher epigenetic  
 822 modification (canalization) of the genes for sexual development<sup>30,31</sup>. This leads to higher genomic  
 823 imprinting and thus to the prolonged helper period of the offspring. Therefore, selection for higher  
 824  $K$  moves the coordinate from  $(R_{1,max}, K_1)$  to  $(R_{2,max}, K_2)$ . (D) Step III (generation  $G_3$ ). In the same  
 825 way as step II, selection favoring higher  $K$  to utilize the surplus resources moves the coordinate  
 826 from  $(R_{2,max}, K_2)$  to  $(R_{3,max}, K_3)$ . (E) The evolutionary process. Trace of the evolution of  
 827 reproductive capacity starting from  $K_1 (= F_0)$ .

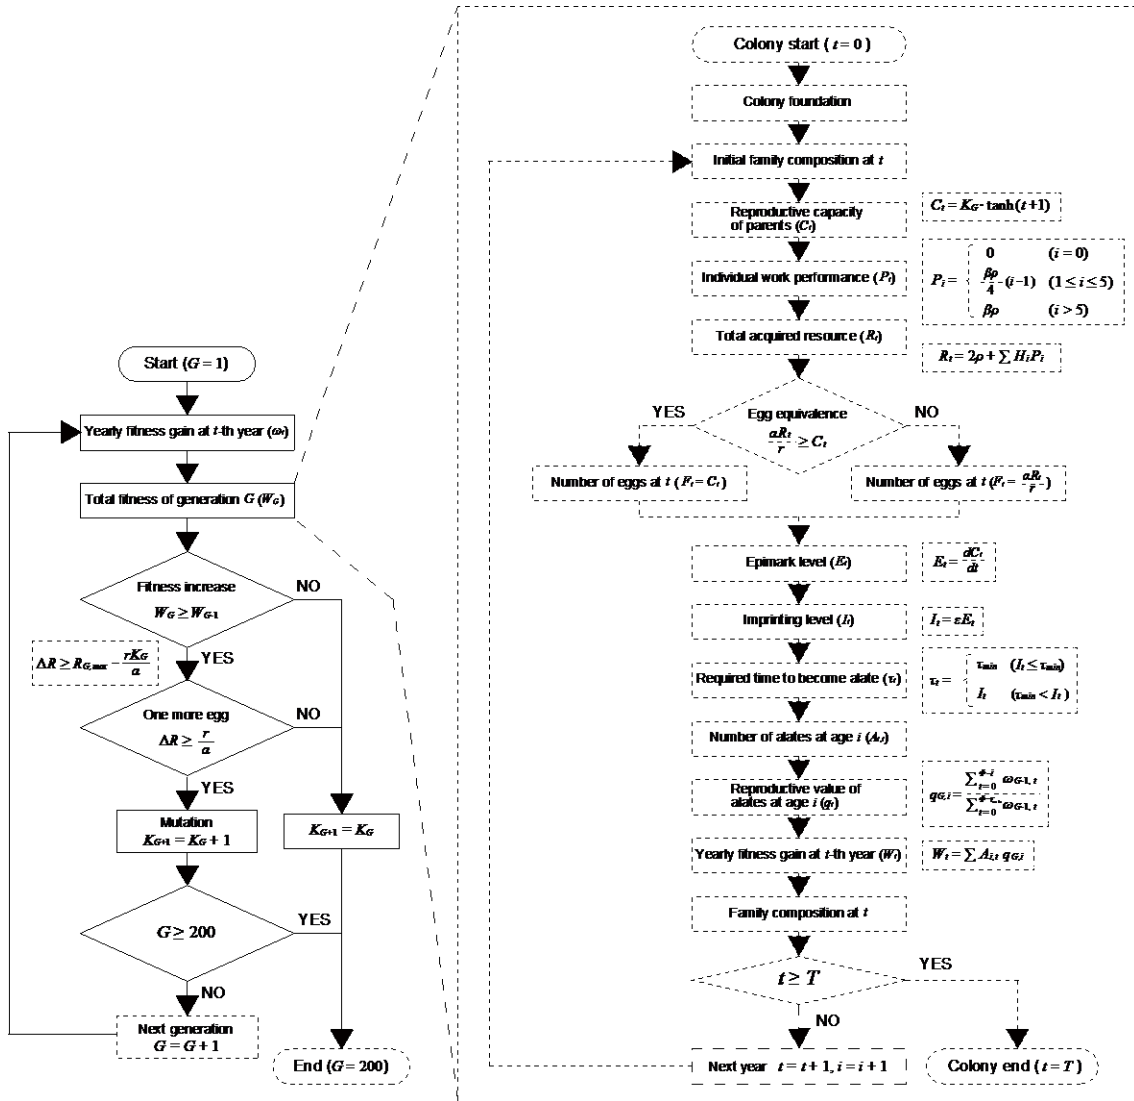

828

829

830 **Fig. S6. Simulation flow.** See Model for the detailed procedure.

831

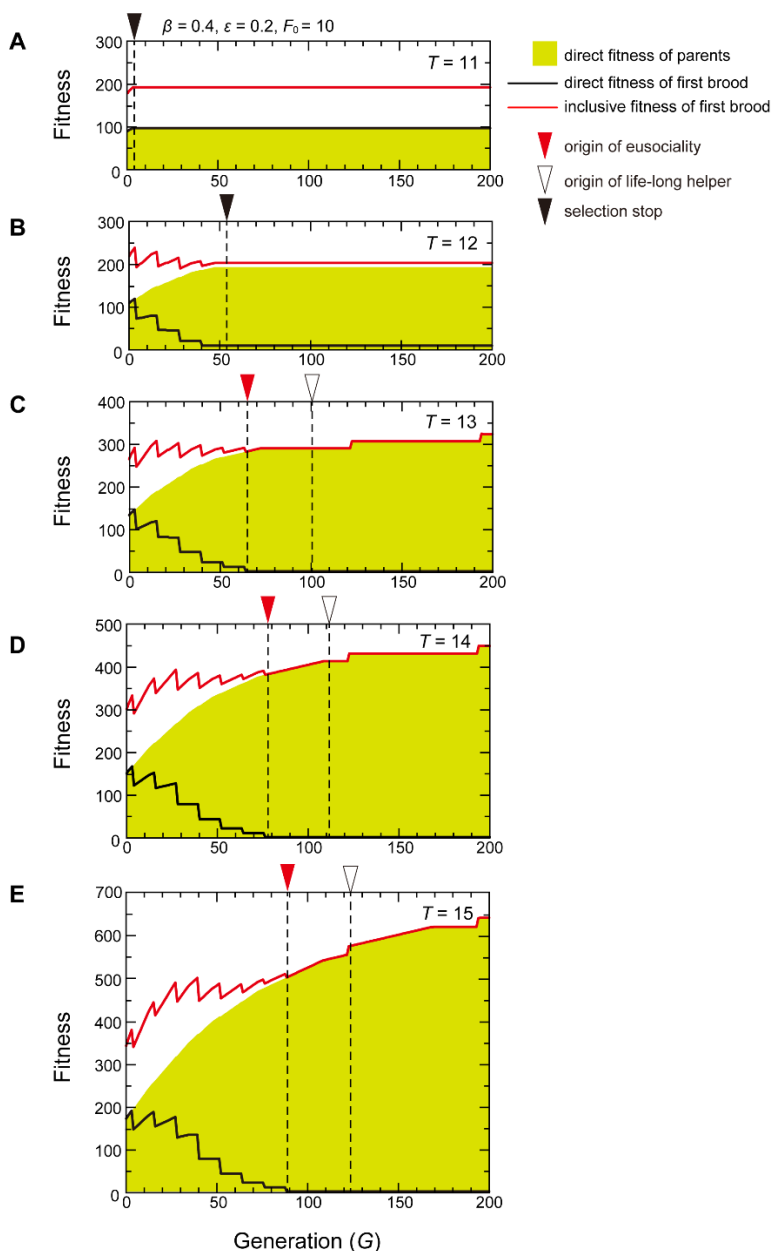

832

833 **Fig. S7. Colony longevity and evolvability of eusociality.** Fitness dynamics of the parents and  
 834 the first brood offspring under different values of colony longevity  $T$ . ( $\beta = 0.4, \varepsilon = 0.2, F_0 = 10$ ). (A,  
 835 B) Colony lifespan is too short for the inception of eusociality. Selection stops, that is, the direct  
 836 fitness of the parents decreases, at generation  $G = 5$  when  $T = 11$  (A) and at  $G = 53$  when  $T = 12$   
 837 (B) without reaching the threshold for eusociality. (C-E) Colony lifespan is sufficient for the evolution  
 838 of eusociality. Eusociality originates at  $G = 65$  when  $T = 13$  (C), at  $G = 77$  when  $T = 14$  (D) and at  
 839  $G = 89$  when  $T = 15$  (E). Green area indicates the direct fitness of parents (the number of alates  
 840 produced by a colony). Black and red lines indicate the direct and inclusive fitness of the first brood,  
 841 respectively. Red arrowheads indicate the origin of eusociality (the appearance of a helper with no  
 842 direct fitness). Open arrowheads indicate the appearance of lifelong helper. Black arrowheads  
 843 indicate the point when selection stops, i.e., the direct fitness of the parents is lower than that of  
 844 the previous generation in numerical calculation.

845 **Table S1. The parameters of the genomic imprinting model**

| Symbol        | Definition                                                                                                                           |
|---------------|--------------------------------------------------------------------------------------------------------------------------------------|
| $i$           | Age of offspring (years)                                                                                                             |
| $\Phi$        | Longevity of individuals (years)                                                                                                     |
| $\tau$        | Time from birth to dispersal (years)                                                                                                 |
| $t$           | Colony age (year), i.e., time after colony foundation                                                                                |
| $T$           | Longevity of a colony, i.e., $\Phi - \tau$ (years)                                                                                   |
| $\omega_t$    | Fitness gain of the colony at $t$                                                                                                    |
| $W$           | Total fitness of a colony                                                                                                            |
| $\rho$        | Work performance of an adult (a founding male or a founding female)                                                                  |
| $R_t$         | The available resources for egg production of a $t$ -year-old colony                                                                 |
| $\alpha$      | Metabolic efficiency of the parents to convert the resources into eggs                                                               |
| $r$           | Cost of producing one egg                                                                                                            |
| $F_t$         | The number of eggs produced in year $t$                                                                                              |
| $P_i$         | Work performance (J/year), i.e., the total resources (J) acquired by a single helper at age $i$ in one year                          |
| $\beta$       | Relative work performance of a helper to that of a parent $\rho$                                                                     |
| $H_i$         | Number of $i$ -year-old helpers                                                                                                      |
| $C_t$         | Reproductive capacity (eggs/year) of the parents of a $t$ -year-old colony, that is, the maximum number of eggs produced in year $t$ |
| $K_G$         | The maximum reproductive capacity, i.e., reproductive capacity of fully-matured parents of generation $G$                            |
| $E_t$         | Epimark level of the parents of a $t$ -year-old colony, that is, the time derivative of $C_t$ (Fig. 3B)                              |
| $\varepsilon$ | Relative strength of epigenetic inheritance                                                                                          |
| $I_t$         | Imprinting level of the offspring produced in year $t$                                                                               |
| $A_{i,t}$     | The number of $i$ -year-old alates produced in year $t$                                                                              |
| $q_{G,i}$     | The reproductive value of the $i$ -year-old alate                                                                                    |

847

848 **Table S2. Parameter combinations in figures**

| <b>Figure</b> | <b>Simulation results</b>                          | <b>Varied Parameters</b>     | <b>Fixed Parameters</b>   |
|---------------|----------------------------------------------------|------------------------------|---------------------------|
| Fig. 4A       | Evolvability of eusociality                        | $\beta, F_0, T, \varepsilon$ |                           |
| Fig. 4B-D     | Fitness dynamics                                   | $\beta$                      | $F_0, \varepsilon, T$     |
| Fig. 4E       | Generations required for the origin of eusociality | $\varepsilon$                | $\beta, F_0, T$           |
| Fig. S7       | Fitness dynamics                                   | $T$                          | $\beta, F_0, \varepsilon$ |

849

850

851 **SI References**

- 852
- 853 Anway MD, Cupp AS, Uzumcu N, Skinner MK. 2005. Toxicology: Epigenetic transgenerational  
854 actions of endocrine disruptors and male fertility. *Science* **308**:1466–1469.  
855 doi:10.1126/science.1108190
- 856 Bonduriansky R, Day T. 2008. Nongenetic inheritance and its evolutionary implications. *Annu Rev*  
857 *Ecol Evol Syst* **40**:103–125.
- 858 Cavalli G, Paro R. 1998. The *Drosophila Fab-7* chromosomal element conveys epigenetic  
859 inheritance during mitosis and meiosis. *Cell* **93**:505–518. doi:10.1016/S0092-  
860 8674(00)81181-2
- 861 Chong S, Whitelaw E. 2004. Epigenetic germline inheritance. *Curr Opin Genet Dev* **14**:692–696.  
862 doi:10.1016/j.gde.2004.09.001
- 863 Daxinger L, Whitelaw E. 2012. Understanding transgenerational epigenetic inheritance via the  
864 gametes in mammals. *Nat Rev Genet* **13**:153–162. doi:10.1038/nrg3188
- 865 Dedeine F, Dupont S, Guyot S, Matsuura K, Wang C, Habibpour B, Bagnères A-GA-G,  
866 Mantovani B, Luchetti A. 2016. Historical biogeography of *Reticulitermes* termites  
867 (Isoptera: Rhinotermitidae) inferred from analyses of mitochondrial and nuclear loci. *Mol*  
868 *Phylogenet Evol* **94**, Part B:778–790. doi:10.1016/j.ympev.2015.10.020
- 869 Deegan DF, Engel N. 2019. Sexual dimorphism in the age of genomics: how, when, where.  
870 *Frontiers in Cell and Developmental Biology* **7**:1–7. doi:10.3389/fcell.2019.00186
- 871 Ferguson-Smith AC. 2011. Genomic imprinting: the emergence of an epigenetic paradigm. *Nat*  
872 *Rev Genet* **12**:565–575. doi:10.1038/nrg3032
- 873 Fougeyrollas R, Dolejšová K, Sillam-Dussès D, Roy V, Poteaux C, Hanus R, Roisin Y. 2015.  
874 Asexual queen succession in the higher termite *Embiratermes neotenicus*. *Proceedings*  
875 *of the Royal Society B* **282**:20150260. doi:10.1098/rspb.2015.0260
- 876 Fougeyrollas R, Křivánek J, Roy V, Dolejšová K, Frechault S, Roisin Y, Hanus R, Sillam - Dussès  
877 D, Sillam-Dussès D. 2017. Asexual queen succession mediates an accelerated colony  
878 life cycle in the termite *Silvestritermes minutus*. *Mol Ecol* **26**:3295–3308.  
879 doi:10.1111/mec.14095
- 880 Fournier D, Hellemans S, Hanus R, Roisin Y. 2016. Facultative asexual reproduction and genetic  
881 diversity of populations in the humivorous termite *Cavitermes tuberosus*. *Proceedings of*  
882 *the Royal Society B* **283**:20160196.
- 883 Galbraith DA, Kocher SD, Glenn T, Albert I, Hunt GJ, Strassmann JE, Queller DC, Grozinger CM.  
884 2016. Testing the kinship theory of intragenomic conflict in honey bees (*Apis mellifera*).  
885 *Proc Natl Acad Sci U S A* **113**:1020–1025.
- 886 Gegner J, Baudach A, Mukherjee K, Halitschke R, Vogel H, Vilcinskas A. 2019. Epigenetic  
887 mechanisms are involved in sex-specific trans-generational immune priming in the  
888 lepidopteran model host *manduca sexta*. *Front Physiol* **10**:1–13.  
889 doi:10.3389/fphys.2019.00137
- 890 Glastad KM, Gokhale K, Liebig J, Goodisman MAD. 2016. The caste- and sex-specific DNA  
891 methylome of the termite *Zootermopsis nevadensis*. *Sci Rep* **6**:37110.  
892 doi:10.1038/srep37110
- 893 Goll MG, Bestor TH. 2005. Eukaryotic cytosine methyltransferases. *Annu Rev Biochem* **74**:481–  
894 514.
- 895 Greer EL, Shi Y. 2012. Histone methylation: A dynamic mark in health, disease and inheritance.  
896 *Nat Rev Genet* **13**:343–357. doi:10.1038/nrg3173
- 897 Gregg C, Zhang J, Butler JE, Haig D, Dulac C. 2010. Sex-specific parent-of-origin allelic  
898 expression in the mouse brain. *Science* **329**:682–685. doi:10.1126/science.1190831
- 899 Grewal SIS, Klar AJS. 1996. Chromosomal inheritance of epigenetic states in fission yeast during  
900 mitosis and meiosis. *Cell* **86**:95–101. doi:10.1016/S0092-8674(00)80080-X
- 901 Hager R, Cheverud JM, Leamy LJ, Wolf JB. 2008. Sex dependent imprinting effects on complex  
902 traits in mice. *BMC Evol Biol* **8**:303.
- 903 Haig D. 2014. Coadaptation and conflict, misconception and muddle, in the evolution of genomic  
904 imprinting. *Heredity* **113**:96–103. doi:10.1038/hdy.2013.97

- 905 Harrison MC, Jongepier E, Robertson HM, Arning N, Bitard-Feildel T, Chao H, Childers CP, Dinh  
906 H, Doddapaneni H, Dugan S, Gowin J, Greiner C, Han Y, Hu H, Hughes DST, Huylmans  
907 AK, Kemena C, Kremer LPM, Lee SL, Lopez-Ezquerria A, Mallet L, Monroy-Kuhn JM,  
908 Moser A, Murali SC, Muzny DM, Otani S, Piulachs MD, Poelchau M, Qu J, Schaub F,  
909 Wada-Katsumata A, Worley KC, Xie Q, Ylla G, Poulsen M, Gibbs RA, Schal C, Richards  
910 S, Belles X, Korb J, Bornberg-Bauer E. 2018. Hemimetabolous genomes reveal  
911 molecular basis of termite eusociality. *Nature Ecology and Evolution* **2**:557–566.  
912 doi:10.1038/s41559-017-0459-1
- 913 Hauser M-T, Aufsatz W, Jonak C, Luschnig C. 2011. Transgenerational epigenetic inheritance in  
914 plants. *Biochim Biophys Acta* **1809**:459–468.  
915 doi:10.1016/j.bbtagm.2011.03.007
- 916 Hayashi Y, Lo N, Miyata H, Kitade O. 2007. Sex-linked genetic influence on caste determination  
917 in a termite. *Science* **318**:985–987.
- 918 Hellemans S, Dolejšová K, Křivánek J, Fournier D, Hanus R, Roisin Y. 2019. Widespread  
919 occurrence of asexual reproduction in higher termites of the *Termes* group (Termitidae:  
920 Termitinae). *BMC Evol Biol* **19**:1–14. doi:10.1186/s12862-019-1459-3
- 921 Hellemans S, Roisin Y. 2020. Asexual queen succession in termites. *Elsevier Oceanogr Ser*  
922 **1**:13–20. doi:10.1002/9780470015902.a0029115
- 923 Holman L, Kokko H. 2014. The evolution of genomic imprinting: Costs, benefits and long-term  
924 consequences. *Biol Rev Camb Philos Soc* **89**:568–587. doi:10.1111/brv.12069
- 925 Jablonka E, Raz G. 2009. Transgenerational epigenetic inheritance: prevalence, mechanisms,  
926 and implications for the study of heredity and evolution. *Q Rev Biol* **84**:131–176.  
927 doi:10.1086/598822
- 928 Kearns M, Preis J, McDonald M, Morris C, Whitelaw E. 2000. Complex patterns of inheritance of  
929 an imprinted murine transgene suggest incomplete germline erasure. *Nucleic Acids Res*  
930 **28**:3301–3309. doi:10.1093/nar/28.17.3301
- 931 Kitade O, Hoshi M, Odaira S, Asano A, Shimizu M, Hayashi Y, Lo N. 2010. Evidence for  
932 genetically influenced caste determination in phylogenetically diverse species of the  
933 termite genus *Reticulitermes*. *Biol Lett* rsbl20100856.
- 934 Lawson HA, Cheverud JM, Wolf JB. 2013. Genomic imprinting and parent-of-origin effects on  
935 complex traits. *Nat Rev Genet* **14**:609–617. doi:10.1038/nrg3543
- 936 Liberman N, Wang SY, Greer EL. 2019. Transgenerational epigenetic inheritance: from  
937 phenomena to molecular mechanisms. *Curr Opin Neurobiol* **59**:189–206.  
938 doi:10.1016/j.conb.2019.09.012
- 939 Luchetti A, Velonà A, Mueller M, Mantovani B. 2013. Breeding systems and reproductive  
940 strategies in Italian *Reticulitermes* colonies (Isoptera: Rhinotermitidae). *Insectes Soc*  
941 **60**:203–211.
- 942 Martin C, Zhang Y. 2007. Mechanisms of epigenetic inheritance. *Curr Opin Cell Biol* **19**:266–272.  
943 doi:10.1016/j.ceb.2007.04.002
- 944 Matsuura K. 2020. Genomic imprinting and evolution of insect societies. *Popul Ecol* **62**:38–52.  
945 doi:10.1002/1438-390x.12026
- 946 Matsuura K. 2017. Evolution of the asexual queen succession system and its underlying  
947 mechanisms in termites. *J Exp Biol* **220**:63–72. doi:10.1242/jeb.142547
- 948 Matsuura K, Mizumoto N, Kobayashi K, Nozaki T, Fujita T, Yashiro T, Fuchikawa T, Mitaka Y,  
949 Vargo EL. 2018. A genomic imprinting model of termite caste determination: Not genetic  
950 but epigenetic inheritance influences offspring caste fate. *Am Nat* **191**:677–690.  
951 doi:10.1086/697238
- 952 Matsuura K, Vargo EL, Kawatsu K, Labadie PE, Nakano H, Yashiro T, Tsuji K. 2009. Queen  
953 succession through asexual reproduction in termites. *Science* **323**:1687.  
954 doi:10.1126/science.1169702
- 955 Miryeganeh M, Saze H. 2020. Epigenetic inheritance and plant evolution. *Popul Ecol* **62**:17–27.  
956 doi:10.1002/1438-390X.12018
- 957 Miska EA, Ferguson-smith AC. 2016. Transgenerational inheritance: Models and mechanisms of  
958 non – DNA sequence – based inheritance **354**:778–782.



- 959 Mitaka Y, Tasaki E, Nozaki T, Fuchikawa T, Kobayashi K, Matsuura K. 2020. Transcriptomic  
960 analysis of epigenetic modification genes in the termite *Reticulitermes speratus*. *Insect*  
961 *Sci* **27**. doi:10.1111/1744-7917.12640
- 962 Moazed D. 2011. Mechanisms for the inheritance of chromatin states. *Cell* **146**:510–518.  
963 doi:10.1016/j.cell.2011.07.013
- 964 Morgan CP, Bale TL. 2011. Early prenatal stress epigenetically programs dysmasculinization in  
965 second-generation offspring via the paternal lineage. *Journal of Neuroscience* **31**:11748–  
966 11755. doi:10.1523/JNEUROSCI.1887-11.2011
- 967 Mukherjee K, Vilcinskas A. 2019. Transgenerational epigenetic inheritance in insects In:  
968 Tollefsbol TO, editor. *Transgenerational Epigenetics*. Academic Press. pp. 315–329.
- 969 Nozaki T, Yashiro T, Matsuura K. 2018. Preadaptation for asexual queen succession: queen  
970 tyochoparthenogenesis produces neotenic queens in the termite *Reticulitermes*  
971 *okinawanus*. *Insectes Soc*. doi:10.1007/s00040-018-0603-1
- 972 Patten MM, Ross L, Curley JP, Queller DC, Bonduriansky R, Wolf JB. 2014. The evolution of  
973 genomic imprinting: Theories, predictions and empirical tests. *Heredity* **113**:119–128.  
974 doi:10.1038/hdy.2014.29
- 975 Perez MF, Lehner B. 2019. Intergenerational and transgenerational epigenetic inheritance in  
976 animals. *Nat Cell Biol* **21**:143–151. doi:10.1038/s41556-018-0242-9
- 977 Reik W, Walter J. 2001. Genomic imprinting: parental influence on the genome. *Nat Rev Genet*  
978 **2**:21–32. doi:10.1038/35047554
- 979 Remy JJ. 2010. Stable inheritance of an acquired behavior in *Caenorhabditis elegans*. *Curr Biol*  
980 **20**:877–878. doi:10.1016/j.cub.2010.08.013
- 981 Rice WR, Friberg U, Gavrilets S. 2016. Sexually antagonistic epigenetic marks that canalize  
982 sexually dimorphic development. *Mol Ecol* **25**:1812–1822.
- 983 Rice WR, Friberg U, Gavrilets S. 2013. Homosexuality via canalized sexual development: a  
984 testing protocol for a new epigenetic model. *Bioessays* **35**:764–770.
- 985 Rice WR, Friberg U, Gavrilets S. 2012. Homosexuality as a consequence of epigenetically  
986 canalized sexual development. *Q Rev Biol* **87**:343–368.
- 987 Serobyán V, Sommer RJ. 2017. Developmental systems of plasticity and trans-generational  
988 epigenetic inheritance in nematodes. *Curr Opin Genet Dev* **45**:51–57.  
989 doi:10.1016/j.gde.2017.03.001
- 990 Suzuki S, Ono R, Narita T, Pask AJ, Shaw G, Wang C, Kohda T, Alsop AE, Marshall Graves JA,  
991 Kohara Y, Ishino F, Renfree MB, Kaneko-Ishino T. 2007. Retrotransposon silencing by  
992 DNA methylation can drive mammalian genomic imprinting. *PLoS Genet* **3**.  
993 doi:10.1371/journal.pgen.0030055
- 994 Szyf M. 2014. Lamarck revisited: epigenetic inheritance of ancestral odor fear conditioning. *Nat*  
995 *Neurosci* **17**:2.
- 996 Thorne BL. 1997. Evolution of eusociality in termites. *Annu Rev Ecol Syst* **28**:27–54.
- 997 Vargo EL, Labadie PE, Matsuura K. 2012. Asexual queen succession in the subterranean termite  
998 *Reticulitermes virginicus*. *Proceedings of the Royal Society B* **279**:813–819.  
999 doi:10.1098/rspb.2011.1030
- 1000 Vigé A, Gallou-kabani C, Junien C. 2008. Sexual dimorphism in non-mendelian inheritance.  
1001 *Pediatr Res* **63**:340–347.
- 1002 Xu W, Dai M, Li F, Liu A. 2014. Genomic imprinting, methylation and parent-of-origin effects in  
1003 reciprocal hybrid endosperm of castor bean. *Nucleic Acids Res* **42**:6987–6998.  
1004 doi:10.1093/nar/gku375
- 1005 Yan H, Bonasio R, Simola DF, Liebig J, Berger SL, Reinberg D. 2015. DNA methylation in social  
1006 insects: how epigenetics can control behavior and longevity. *Annu Rev Entomol* **60**:435–  
1007 452.

1008

**A**

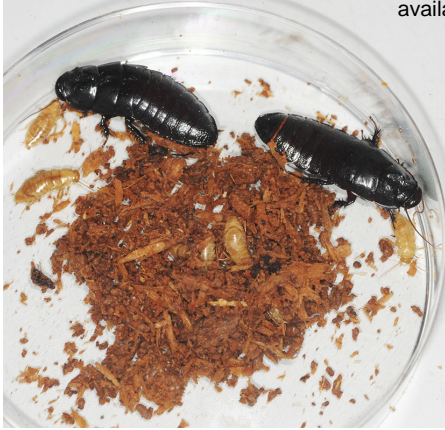

**B**

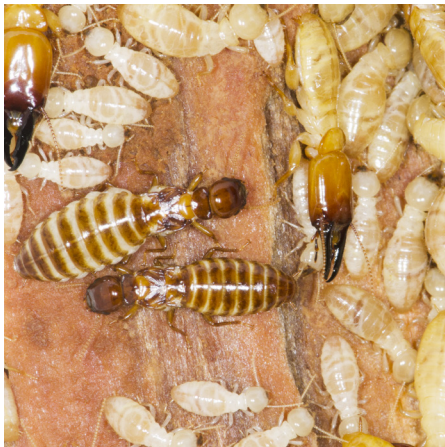

**C**

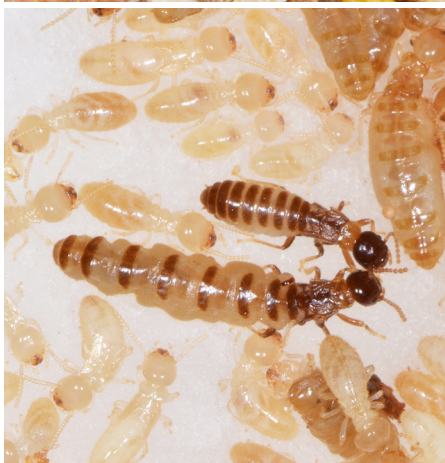

**D**

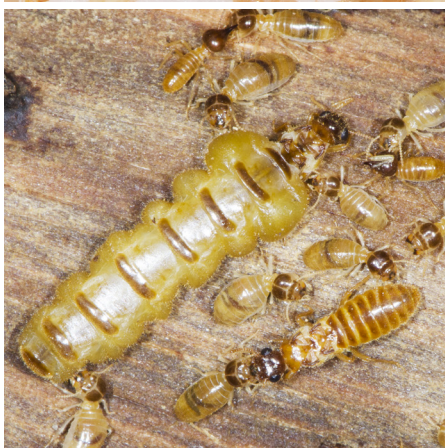

**E**

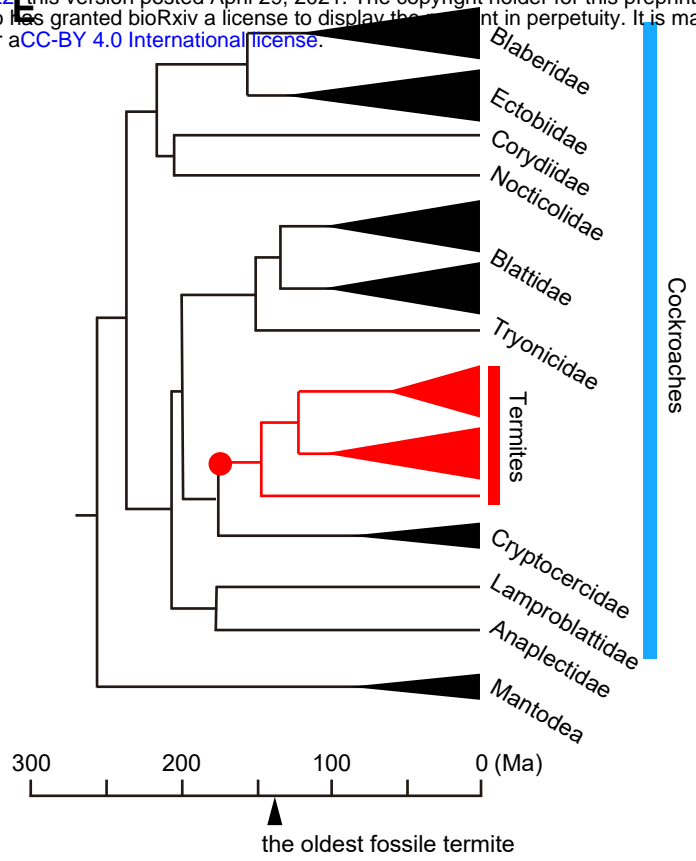

**F**

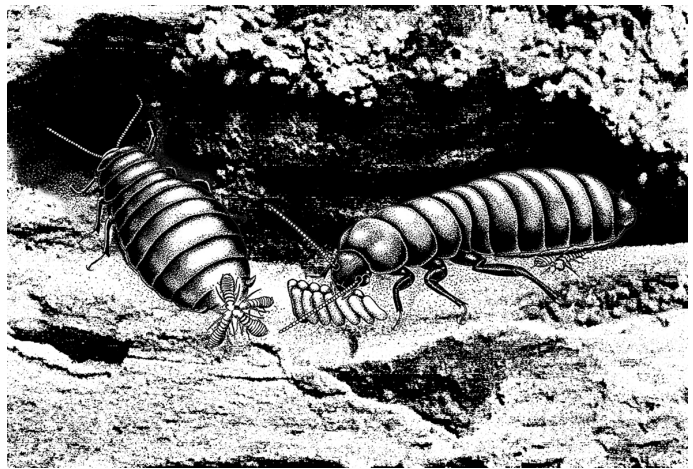

**G**

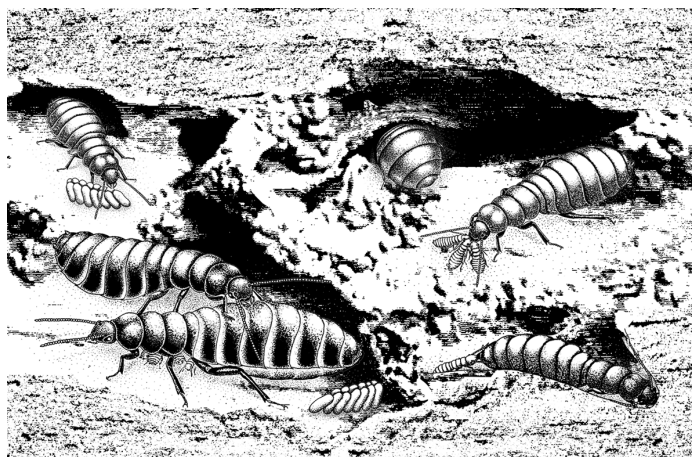

Fig. 1

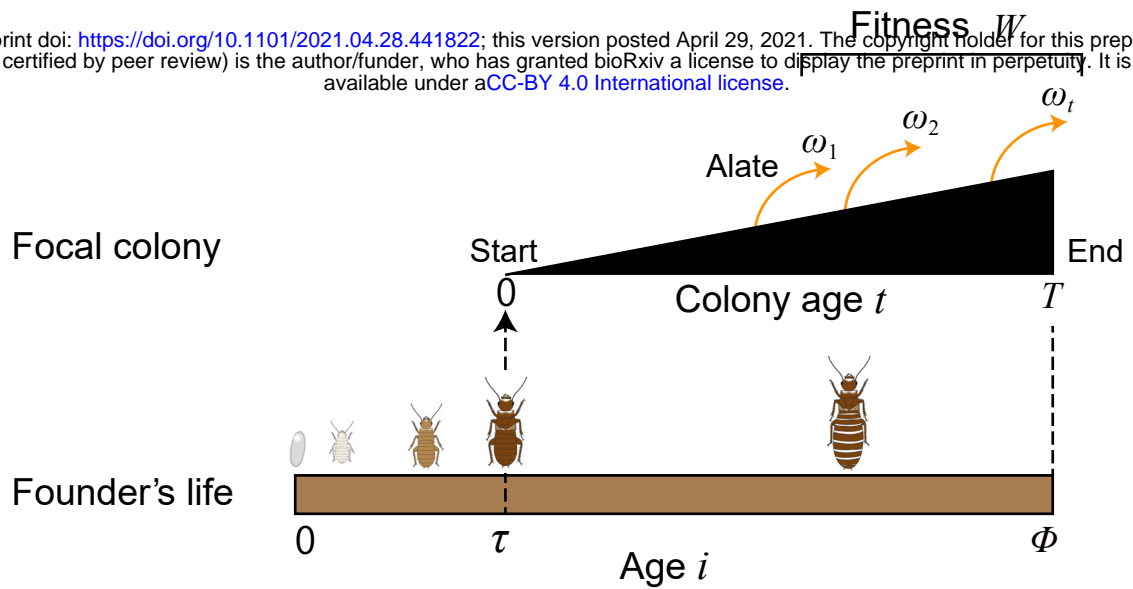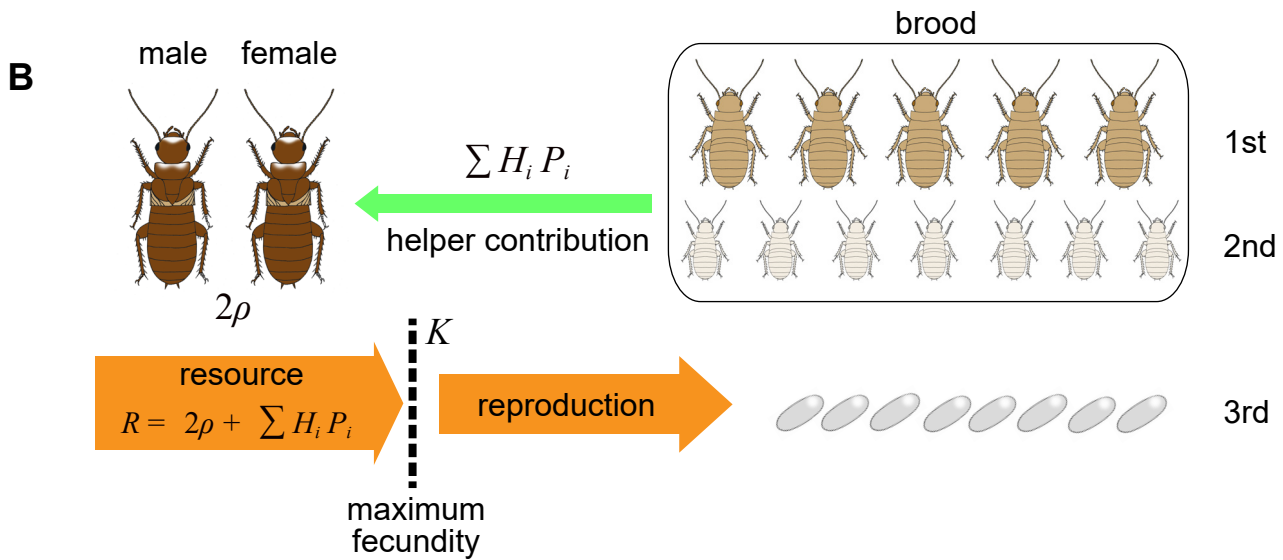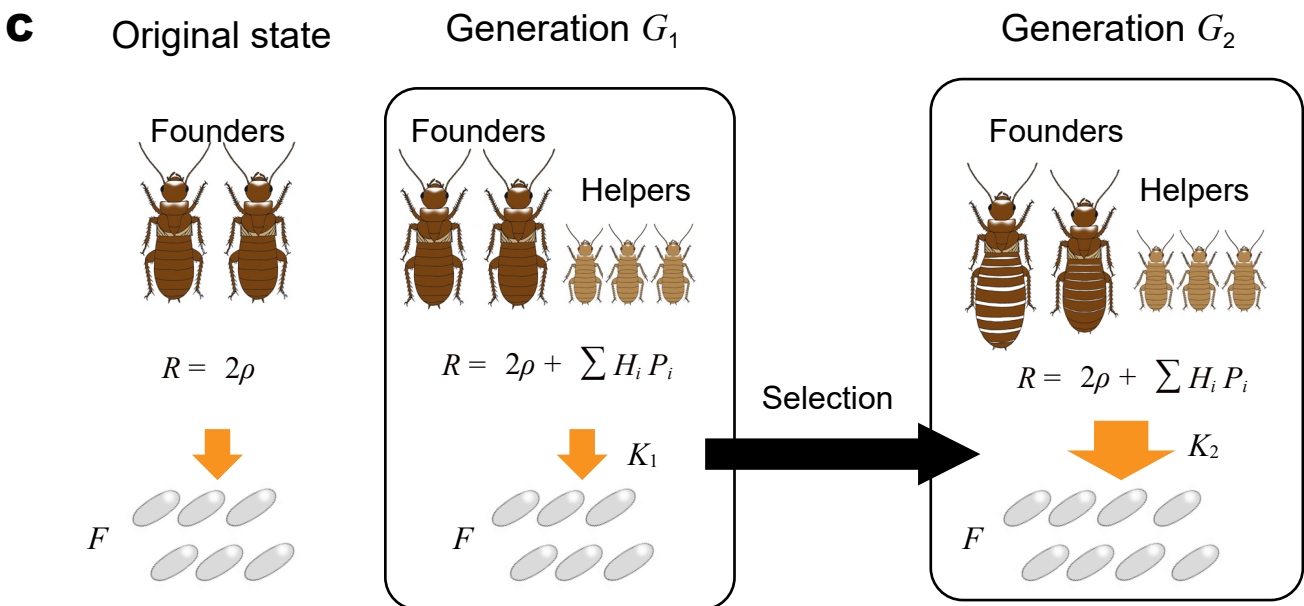

Fig. 2

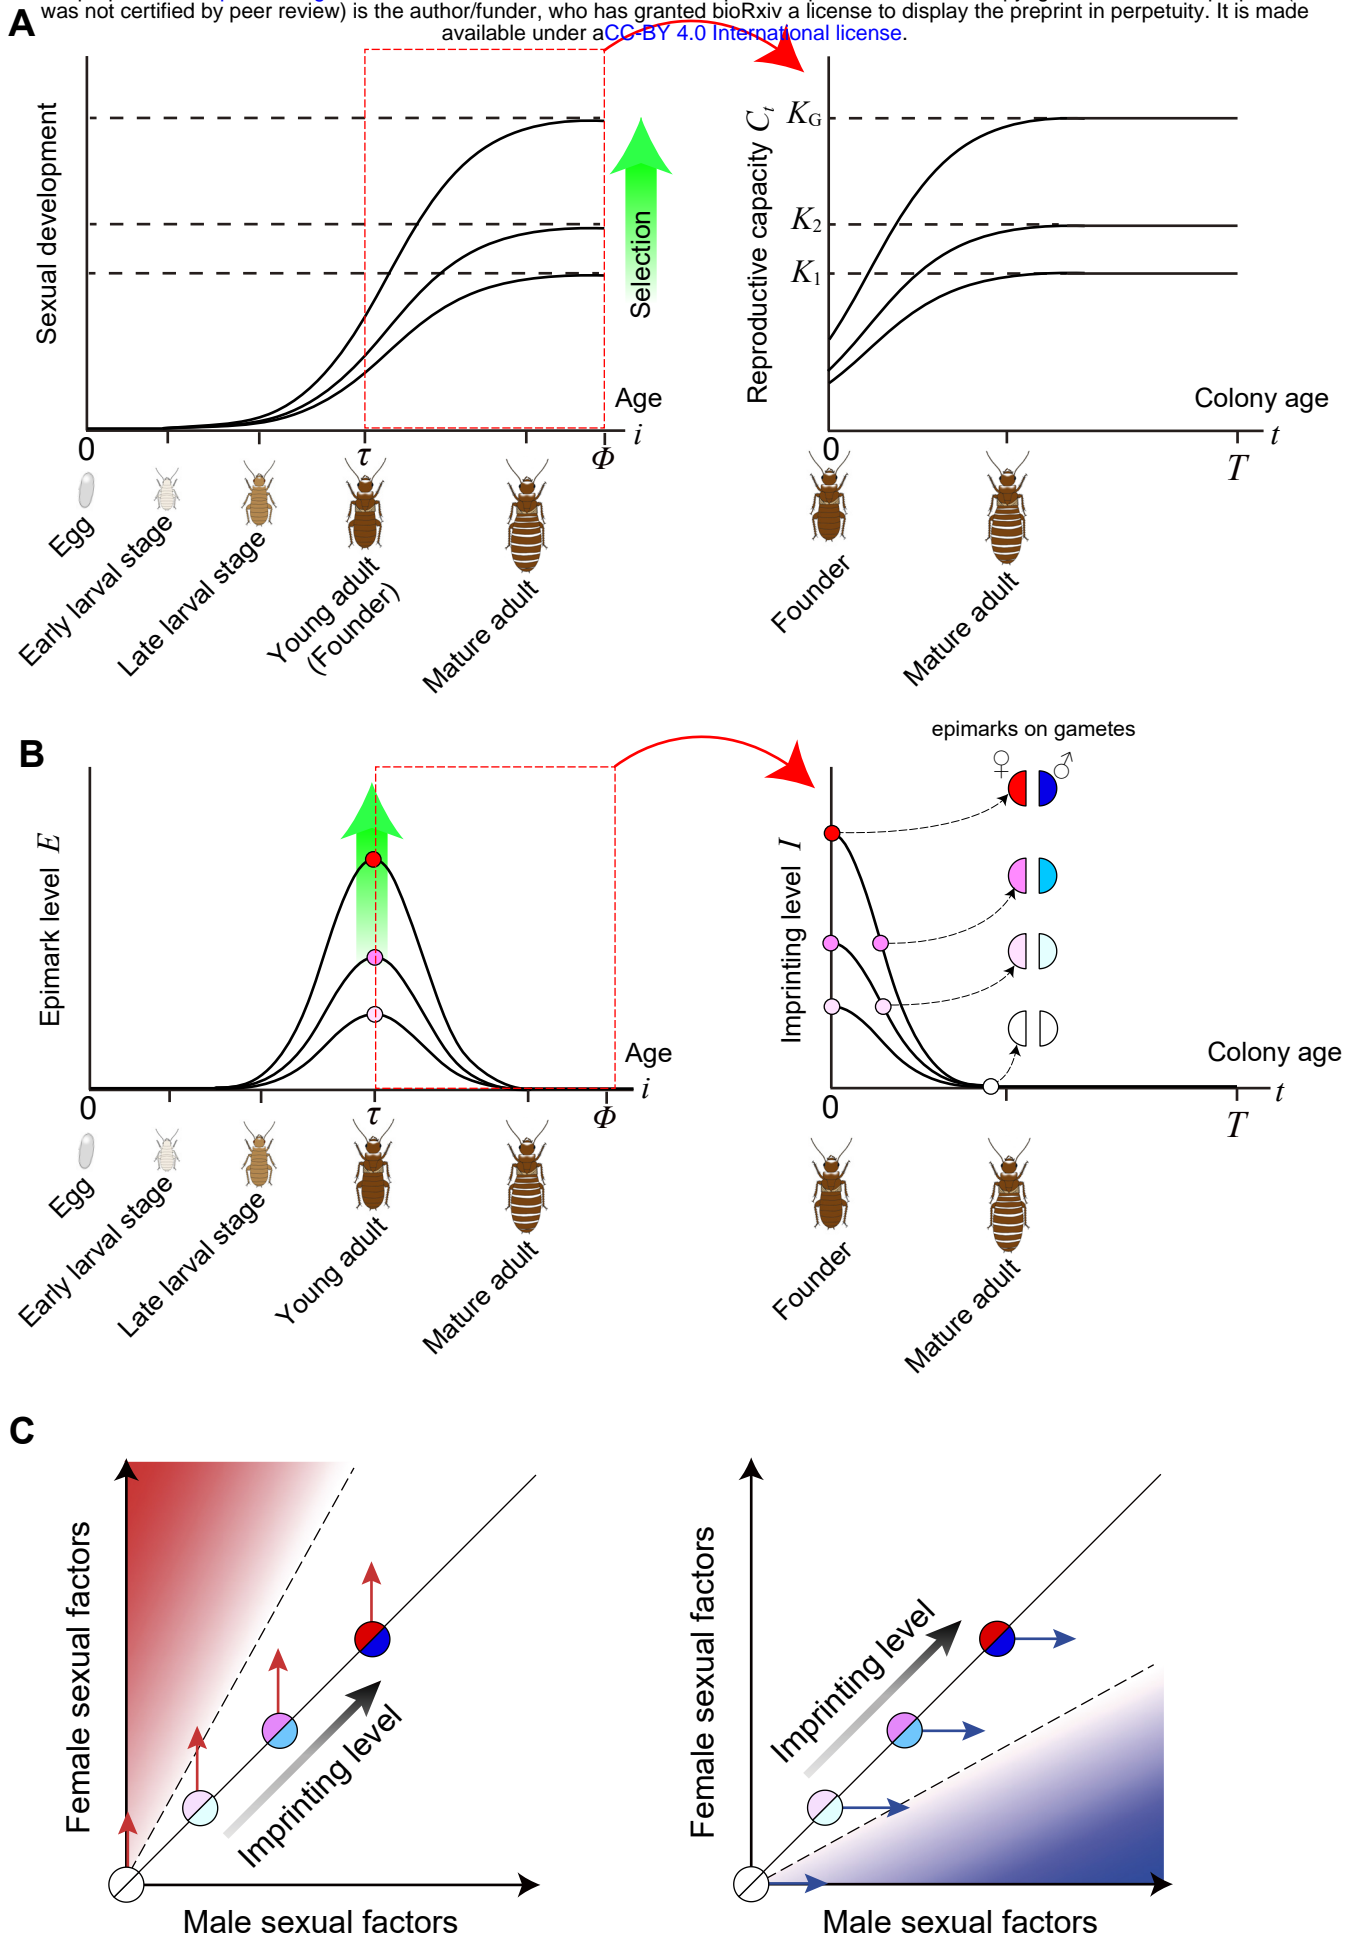

Fig. 3

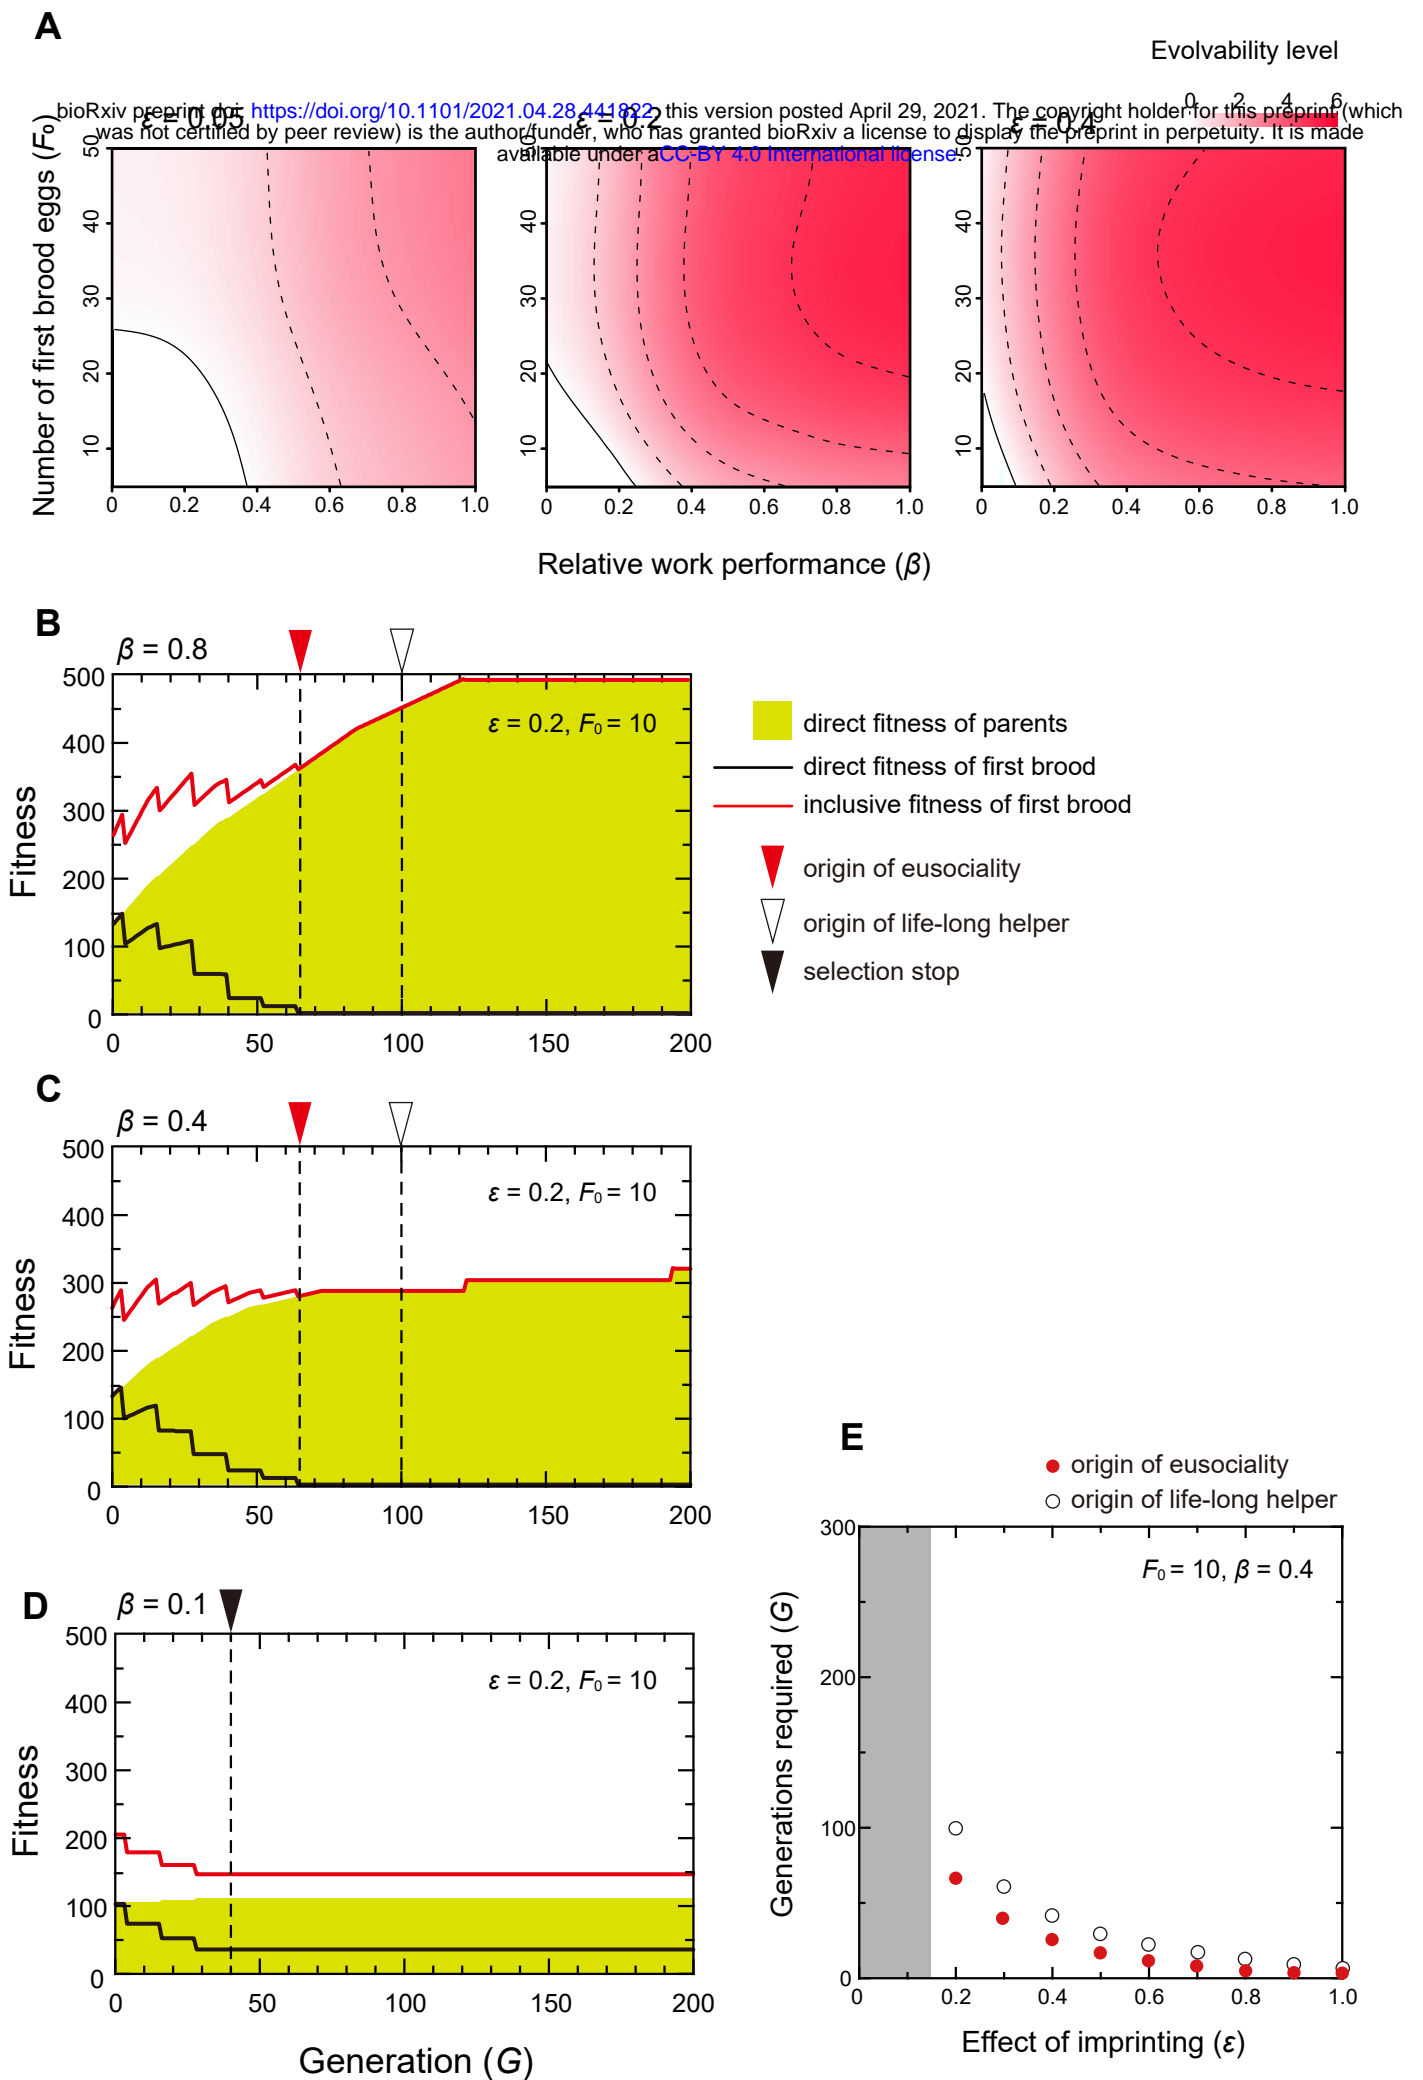

Fig. 4
